# Supplementary material for: Development and validation of an emotional picture set of self-injury (EPSI) for borderline personality disorder: protocol for a validation study
Source: PubMed Central journal article supplement — BMJ Open. 2019 May 22;9(5):e027063. doi: 10.1136/bmjopen-2018-027063 (PMC6538202; doi:10.1136/bmjopen-2018-027063), 2019-05-22
Supplement: bmjopen-2018-027063.draft_revisions.pdf [file bmjopen-2018-027063.draft_revisions.pdf]

# BMJ Open

BMJ Open is committed to open peer review. As part of this commitment we make the peer review history of every article we publish publicly available.

When an article is published we post the peer reviewers' comments and the authors' responses online. We also post the versions of the paper that were used during peer review. These are the versions that the peer review comments apply to.

The versions of the paper that follow are the versions that were submitted during the peer review process. They are not the versions of record or the final published versions. They should not be cited or distributed as the published version of this manuscript.

BMJ Open is an open access journal and the full, final, typeset and author-corrected version of record of the manuscript is available on our site with no access controls, subscription charges or pay-per-view fees (<http://bmjopen.bmj.com>).

If you have any questions on BMJ Open's open peer review process please email [info.bmjopen@bmj.com](mailto:info.bmjopen@bmj.com)

# BMJ Open

## Protocol article: Developing and validation of an emotional picture set of self-injury (EPSI) for Borderline personality disorder

|                               |                                                                                                                                                                                                                                                                                                                                                                                                                                                                     |
|-------------------------------|---------------------------------------------------------------------------------------------------------------------------------------------------------------------------------------------------------------------------------------------------------------------------------------------------------------------------------------------------------------------------------------------------------------------------------------------------------------------|
| Journal:                      | <i>BMJ Open</i>                                                                                                                                                                                                                                                                                                                                                                                                                                                     |
| Manuscript ID                 | bmjopen-2018-027063                                                                                                                                                                                                                                                                                                                                                                                                                                                 |
| Article Type:                 | Protocol                                                                                                                                                                                                                                                                                                                                                                                                                                                            |
| Date Submitted by the Author: | 15-Oct-2018                                                                                                                                                                                                                                                                                                                                                                                                                                                         |
| Complete List of Authors:     | Bachmann, Katharina; Carl von Ossietzky Universitat Oldenburg, Schulze, Marcel; Rheinische Friedrich-Wilhelms-Universitat Bonn Soeroes, Peter; University of Oldenburg Schmahl, Christian; Central Institute of Mental Health, Medical Faculty Mannheim, Heidelberg University Philipsen, Alexandra; Rheinische Friedrich-Wilhelms-Universitat Bonn, Department of Psychiatry and Psychotherapy; University of Freiburg, Faculty of Medicine University of Freiburg |
| Keywords:                     | Borderline, Emotion regulation, Emotional stimuli, NSSI                                                                                                                                                                                                                                                                                                                                                                                                             |
|                               |                                                                                                                                                                                                                                                                                                                                                                                                                                                                     |

SCHOLARONE™  
Manuscripts

# Protocol article: Developing and validation of an emotional picture set of self-injury (EPSI) for Borderline personality disorder

---

Bachmann<sup>1\*</sup>, Schulze<sup>2\*</sup>, Sörös<sup>3,4</sup>, Schmahl<sup>5</sup>, Philipsen<sup>2,6</sup>

<sup>1</sup> Medical Campus University of Oldenburg, School of Medicine and Health Sciences, Psychiatry and Psychotherapy – University Hospital, Karl-Jaspers-Klinik, Bad Zwischenahn, Germany

<sup>2</sup> Department of Psychiatry and Psychotherapy, University of Bonn, Bonn, Germany

<sup>3</sup> Research Center Neurosensory Science, University of Oldenburg, Oldenburg, Germany

<sup>4</sup>Neurology, School of Medicine and Health Sciences, University of Oldenburg, Oldenburg, Germany

<sup>5</sup>Department of Psychosomatic Medicine and Psychotherapy, Central Institute of Mental Health, Medical Faculty Mannheim, Heidelberg University

<sup>6</sup>Department of Psychiatry and Psychotherapy Medical Center – University of Freiburg, Faculty of Medicine University of Freiburg, Germany

\* Both authors contributed equally

**Word count**

Abstract: 194

Text: 3227

References: 62

Tables &amp; figures: 3

Issue date: Oct 2018

Original

Authors: KB, MS, PS, CS, AP

For peer review only

Corresponding author:

Katharina Bachmann

Medical Campus University of Oldenburg, School of Medicine and Health Sciences, Psychiatry and  
Psychotherapy – University Hospital, Karl-Jaspers-Klinik, Bad Zwischenahn, Germany

Postal address: Hermann-Ehlers-Straße 7, 26160 Bad Zwischenahn, Germany.

Tel.: 0049-441-9615-1501

Fax: 0049-441-9615-1599

Email: Katharina.Bachmann@uni-oldenburg.de

## 48 **Abstract**

49 **Introduction:** Borderline personality disorder (BPD) is a severe psychiatric disorder that is  
50 characterized by major problems in emotion regulation. Affected persons frequently engage in non-  
51 suicidal self-injury (NSSI) to regulate emotions. NSSI is associated with high emotionality in BPD  
52 patients and it can be expected that stimuli depicting scenes of NSSI elicit an emotional response  
53 distinctive for BPD. The current study protocol describes the development and validation of an  
54 emotional picture set of self-injury (EPSI) to advance future research on emotion regulation in BPD.

55 **Methods and analysis:** The current case-controlled experiment aims to develop and validate an  
56 emotional picture set relevant for BPD. Emotional response to EPSI as well as to a neutral picture  
57 set will be investigated in a sample of 30 BPD patients compared to 30 matched, healthy controls  
58 and to 30 matched depressive controls. Emotional response will be assessed by heart rate  
59 variability (HRV), facial expression and self-assessment manikin (SAM).

60 **Ethics and dissemination:** Ethics approval was obtained by the medical ethics committee of the  
61 Carl-von-Ossietzky University of Oldenburg, Germany (registration: 2017-044). Results of the main  
62 trial and each of the secondary endpoints will be submitted for publication in a peer-reviewed  
63 journal.

64 **Trial registration number:** [clinicaltrials.gov: NCT03149926](https://clinicaltrials.gov/ct2/show/study/NCT03149926)

65 **Keywords:** Borderline, Emotion regulation, Emotional stimuli, NSSI

66

67

68

69

70

71

72

## 73 **Article Summary**

74 This study aims to develop and validate an emotional picture set for BPD. Previous research  
75 suggests that to reliably elicit an emotional response emotional stimuli material has to tap into  
76 disorder-relevant emotional themes. NSSI has been strongly connected to BPD symptomatology and  
77 can be expected to elicit a distinct emotional response in persons with BPD. The purpose of the  
78 current study is to create the first standardized image database depicting scenes of NSSI (EPSI) and  
79 in a second step to validate the database in a sample of persons with BPD, a depressive control  
80 group, and a healthy control group. The availability of a standardized and BPD relevant emotional  
81 picture set is a valuable tool to advance clinical as well as neuroimaging research on emotion  
82 regulation in BPD.

## 83 **Strength and limitations of this study**

- 84 • Controlled study design to develop emotional stimuli relevant for BPD
- 85 • Emotional reaction is assessed by subjective as well as objective measurements
- 86 • Emotion evocation is limited to NSSI however other emotional trigger (e.g. social  
87 interaction) are not investigated
- 88 • Limited to BPD patients that actually engage in NSSI

89

## 90 Introduction

91 Borderline personality disorder (BPD) is a severe psychiatric disorder that is characterized by  
92 impairments in interpersonal, cognitive, and emotional functioning (APA, 2013; Lieb, Zanarini,  
93 Schmahl, Linehan, & Bohus, 2004). Pervasive problems in affect regulation have been identified as  
94 the central area of dysfunction in BPD. BPD even has been conceptualized as a disorder of the  
95 emotion regulation system (Linehan, 1993). Emotion dysregulation comprises high emotional  
96 vulnerability in conjunction with an inability to regulate emotions. Emotional vulnerability in  
97 individuals with BPD is characterized by high sensitivity to emotional stimuli, unusual emotional  
98 intensity and a slow return to emotional baseline (emotions are long lasting). In addition, the  
99 identification, expression, and inhibition of emotions are impaired (Linehan, 1993; J. Svaldi, C. Dorn,  
100 S. Matthies, & A. Philipsen, 2012).

101 Not surprisingly, emotional evocative material is commonly used to investigate BPD pathology.  
102 Previous studies have employed various emotional stimuli such as emotional facial expression  
103 (Baskin-Sommers et al., 2015; Cullen et al., 2016), pleasant or unpleasant pictures (Hazlett et al.,  
104 2012; Suvak et al., 2012), pictures and video clips depicting social interactions (Koenigsberg et al.,  
105 2009; Lobbestael & Arntz, 2015) or script driven imagery of an act of self-injury (Kraus et al., 2010).  
106 However, research findings on emotion regulation in BPD to date are inconsistent in terms of  
107 evoking emotional responses in BPD patients (Sloan et al., 2010; van Zutphen, Siep, Jacob, Goebel, &  
108 Arntz, 2015). While some studies did not find evidence for abnormal emotional responsiveness in  
109 BPD (Feliu-Soler et al., 2013; Kuo & Linehan, 2009; Suvak et al., 2012) others did (D. Eddie & M. E.  
110 Bates, 2017; Kraus et al., 2010; C. Sauer, E. A. Arens, M. Stopsack, C. Spitzer, & S. Barnow, 2014). One  
111 possible explanation for these contradictory results might be that the stimulus material was not  
112 specific enough to elicit an emotional response in persons with BPD. For example, in a recent study  
113 that addressed the potential difference in emotional response depending on the specificity of the  
114 presented stimuli baseline emotional intensity and emotional reactivity in BPD patients were  
115 compared to healthy controls. Emotional response to six discrete emotion-eliciting film clips was  
116 evaluated by means of physiological and subjective reactions. Furthermore, the two groups were  
117 compared regarding their emotional reaction to films containing content associated with BPD (e.g.  
118 sexual abuse, emotional dependence, and abandonment/separation). Compared to healthy controls,  
119 persons with BPD did not show subjectively heightened reactivity to most of the discrete emotion-  
120 eliciting films but a significant stronger emotional response on "BPD-specific content" films (C.  
121 Sauer et al., 2014). Those findings suggest that measuring emotion dysregulation in BPD might only  
122 arise in contexts that are psychologically challenging (Sloan et al., 2010; Suvak et al., 2012). The

1  
2  
3 123 actual emergence and intensity of emotions depend on an array of psychological characteristics of  
4 124 the person such as personality, learning experiences and cognition, the situational context but also  
5 125 on the type and intensity of the perceived stimulus (Kučera & Haviger, 2012). Emotional stimuli that  
6 126 activate specific, self-relevant information seem to arouse a more intense emotional reaction than  
7 127 more general emotional stimuli (Philippot, Schaefer, & Herbet, 2003). Therefore, to elicit a  
8 128 distinctive and BPD specific emotional response the stimulus material has to have a high relevance  
9 129 for persons with BPD and has to trigger sensitivities distinct for BPD (Suvak et al., 2012). Such a  
10 130 triggering event could be the presentation of material used for non-suicidal self-injury (NSSI).

11 131 NSSI is associated with clinical and functional impairments and occurs in a variety of psychiatric  
12 132 disorders (Zetterqvist, 2015). There is an ongoing scientific debate regarding the conceptualization  
13 133 and diagnostic organization of NSSI. The fifth version of the Statistical and Diagnostic Manual of  
14 134 Mental Disorders (DSM-5) presents Non-Suicidal Self-Injury Disorder (NSSID) as a separate  
15 135 nosological entity however as a condition that requires further investigation (Association, 2013;  
16 136 Zetterqvist, 2015). This shows that NSSI is not unique to BPD. However, there is a general consensus  
17 137 that NSSI is related to BPD and can be considered as a core symptom of the disorder (APA, 2013;  
18 138 Zetterqvist, 2015). NSSI is defined as the deliberate destruction of healthy body tissue that is not  
19 139 suicidal in nature. About 90% of patients with BPD do engage in NSSI (Zanarini et al., 2008). NSSI  
20 140 typically includes repeated behaviors, such as skin cutting, banging or hitting, burning, scratching,  
21 141 and interfering with wound healing (Favazza, 1998). Emotion dysregulation is closely linked to NSSI  
22 142 in persons with BPD. According to the experiential avoidance model, NSSI is applied to reduce or  
23 143 remove aversive emotional experiences and might be maintained by negative reinforcement  
24 144 (Chapman, Gratz, & Brown, 2006; Nock & Prinstein, 2004; Reitz et al., 2015).

25 145 Empirical evidence suggests that NSSI is commonly performed as emotion regulation strategy. Self-  
26 146 injurers use NSSI to reduce unpleasant feelings, overcome dissociation, for self-punishment or for  
27 147 the reduction of aversive inner tension (Andover & Morris, 2014; E. D. Klonsky, 2007). Typically,  
28 148 NSSI is preceded by high arousal of negative emotions whereas NSSI behavior is associated with a  
29 149 decrease in these emotions (E. D. Klonsky, 2007; Victor & Klonsky, 2014). For example, a decrease in  
30 150 negative affect and arousal was observed in self-injurers that were asked to visualize cutting or to  
31 151 engage in another painful behavior whereas the performance of a non NSSI-related task did not lead  
32 152 to a decrease (E. D. Klonsky, 2007). In addition, seeing blood during NSSI seems to be an important  
33 153 aspect for many self-injurers. Glenn and Klonsky (2010) investigated the role of seeing blood during  
34 154 NSSI in persons with a history of NSSI. Most participants (51.6%) reported seeing blood during NSSI  
35 155 was important. Furthermore, participants reported that seeing blood fulfilled multiple functions



1  
2  
3 156 such as, to relieve tension (84.8%), to calm down (72.7%), to feel real (51.5%), to show the realness  
4 157 of NSSI (42.4%), to help focus (33.3%) and to show that NSSI has been performed correctly/deep  
5 158 enough (15.2%). A pilot study by Naoum et al. (2016) compared 20 female BPD patients and 20  
6 159 healthy controls (HC) to investigate the effect of seeing blood during NSSI following stress and pain  
7 160 induction. The BPD patients showed a significantly stronger decrease in arousal than the HC group,  
8 161 however with no significant effects between blood and non-blood conditions. In addition, the urge  
9 162 for NSSI, significantly greater decreased in the blood condition in BPD patients. While, seeing blood  
10 163 did not bring greater tension relief.

11 164 Despite the connection of deficient emotion regulation and NSSI in BPD, yet no study is available  
12 165 that uses stimuli depicting different stages of NSSI to investigate whether the emotional reaction of  
13 166 BPD patients is gradually dependent on the stage of NSSI shown by the stimuli. A specified stimuli-  
14 167 database, validated in a BPD population for evoking emotional responses in BPD is however lacking.

### 15 168 **This Study**

16 169 Although emotion dysregulation is recognized as a core symptom of BPD, current evidence is  
17 170 inconsistent and contradictory. This could be, at least partially, explained by the use of  
18 171 unsuitable and unspecific emotional stimulus material that does not tap into BPD-relevant themes.  
19 172 However, to improve and extend research on emotion regulation in BPD the availability of validated  
20 173 emotional stimuli that reliably elicit emotional reactions distinct for BPD is a necessary prerequisite.

21 174 This study aims to develop and validate an emotional picture set, EPSI (emotional picture set with  
22 175 scenes of self-injury), relevant for BPD. In a second step, the emotional reaction will be assessed by  
23 176 means of a self-report measurement as well as by a psychophysiological assessment of the  
24 177 emotional reaction in a sample of persons with BPD who engage in NSSI, in a depressive control  
25 178 group and in a sample of matched healthy controls. Furthermore, participants are asked to indicate  
26 179 how strong the pictures relate to their person or biography. EPSI depicts objects frequently used for  
27 180 NSSI and show the application of those objects at different stages of NSSI (pre-NSSI, NSSI, post-  
28 181 NSSI). As NSSI can be associated with different emotional reactions depending on the stage of NSSI,  
29 182 differences in the emotional reaction are expected for persons with BPD for the specific NSSI  
30 183 categories. In a pre-NSSI stage (preparing for NSSI), negative affect, arousal and tension are  
31 184 expected to be strongest. When starting NSSI, negative affect, arousal and tension might start to  
32 185 decrease. On a post-NSSI stage (successfully performed NSSI, seeing blood), an even stronger  
33 186 decrease of emotions and a sense of relief and relaxation is expected. It is hypothesized that the  
34 187 control groups show the opposite emotional reaction with lowest emotional response when seeing

188 pictures of a pre-NSSI stage and strongest emotional response when watching post-NSSI pictures.  
189 Furthermore, BPD participants are expected to report higher self-reference regarding the pictures  
190 in comparison to the healthy controls.

191 To investigate if our database is BPD relevant, the evaluations of the NSSI images will be compared  
192 to neutral images and also to two different control groups. This study allows for investigating to  
193 what extent EPSI can elicit an emotional response distinctive for persons with BPD and if the  
194 emotional response differs with regard to the stage of NSSI.

### 195 **Objectives**

196 Primary outcome variables are self-rated emotional reaction measured with the Self-Assessment-  
197 Manikin (SAM, (M. M. Bradley & P. J. Lang, 1994)); psychophysiological measurements of emotion  
198 will be assessed by heart rate variability (HRV) as indicator of Autonomic Nervous System (ANS)  
199 activity and the analyses of facial expression as measured with Noldus FaceReader software  
200 (Noldus Information Technology, [www.noldus.com](http://www.noldus.com)). As a secondary outcome variable, Self-  
201 reference of EPSI will be measured on a 5-point Likert-scale with the item 'How much do you see a  
202 relation to your own person/ to your biography?' from 1 (not at all) to 5 (very much) (C. Sauer et al.,  
203 2014).

204 Primary objectives:

- 205 1. To determine a BPD symptomatic-relevant stimuli-set, an image database of NSSI will be  
206 created and validated (EPSI).
- 207 2. To identify whether EPSI elicit a stronger emotional reaction in individuals with BPD having  
208 a history of NSSI, the emotional reaction to EPSI will be compared within group-wise to the  
209 emotional reaction to neutral stimuli and between group-wise to healthy controls and to  
210 depressed patients .

211 Secondary objectives:

- 212 1. To assess the extend, to which the emotional reaction on EPSI in persons with BPD that  
213 engage in NSSI is gradually dependent when seeing pre-NSSI, NSSI, and post NSSI pictures.
- 214 2. To investigate if persons with BPD that engage in NSSI rate EPSI as more self-referential  
215 than matched healthy controls and depressive controls do.
- 216 3. To determine if self-referential measurement correlates positive with the actual emotional  
217 response.
- 218 4. To assess if BPD symptomatology correlates positively with the emotional response.

- 1  
2  
3 219 5. To investigate if self-rated emotional response does correlate with psychophysiological  
4 220 measurements of emotional response within and between groups.  
5  
6  
7

## 8 221 **Methods and analysis**

### 9 222 **Participants**

10  
11 223 In total 90 participants (30 BPD patients, 30 depressed patients, and 30 healthy control subjects)  
12 224 aged from 18-60 years will be recruited. To control for altered autonomic response all participants  
13 225 have to be free of severe, persistent neurological disorders (in particular, epilepsy, multiple  
14 226 sclerosis, stroke or neurodegenerative disease) and are not allowed to be currently medicated with  
15 227 antihistamines, neuroleptic medication, tranquilizers or beta blockers. Further, the BPD patients  
16 228 need to have a lifetime history of self-injury. Further exclusion criteria for the BPD patients are:  
17 229 psychotic disorders, current major depressive episode, acute suicidal crisis. The patients in the  
18 230 depressed control group need to have a depressive episode > 2weeks. The control groups will be  
19 231 matched to the BPS group for age and sex. The healthy control group has not to exhibit a current  
20 232 psychiatric disorder or history of self-injury.  
21  
22  
23  
24  
25  
26  
27  
28  
29

### 30 233 ***Patient and public involvement***

31  
32 234 Patients were not involved in the development of the research question, outcome measures or study  
33 235 design.  
34  
35  
36

### 37 236 **Diagnostic procedure**

38 237 Assessments of DSM-IV Personality Disorders (ADP-IV) (Doering et al., 2007; Schotte & De Doncker,  
39 238 1994) and the Borderline Symptom Checklist (BSL-23) (Wolf et al., 2009) will be used to verify the  
40 239 diagnosis of BPD and to assess BPD symptoms. The structured clinical interview (SKID I,II) will be  
41 240 performed to assess psychiatric disorders (Wittchen, Wunderlich, Gruschwitz, & Zaudig, 1997).  
42  
43  
44  
45

46 241 To record the history and methods of self-injury, the Inventory of Statements about Self-Injury and  
47 242 the Self-Harm Behavior Questionnaire will be applied (Gutierrez, Osman, Barrios, & Kopper, 2001;  
48 243 Klonsky & Glenn, 2009). The general psychopathology will be recorded with the symptom  
49 244 checklist-90 (SCL-90) (Franke, 2002). Depressive symptoms will be self-rated with the Beck  
50 245 Depression Inventory (BDI) (Beck, Steer, & Brown, 1996). Since the study will assess the emotional  
51 246 processing of images, the current mood and stress of the participants could have an influence.  
52 247 Therefore, they will be asked how emotionally strained and charged they are at the moment before  
53  
54  
55  
56  
57  
58  
59  
60

1  
2  
3 248 and during testing on a Likert-scale ranging from 0-10. To check on the patient, a short break in the  
4 249 middle of the experiment is planned. Acute somatic and psychological dissociation will be assessed  
5  
6 250 by the short version of the Dissociative State Scale (DSS) (Stiglmayr, Braakmann, Haaf, Stieglitz, &  
7  
8 251 Bohus, 2003). Further, a demographic questionnaire, as well as the Edinburgh Handedness  
9  
10 252 Inventory (Oldfield, 1971) will be applied.

## 11 12 253 **Stimuli**

13  
14 254 Photographs and image processing will be made by a professional photographer. Three categories  
15  
16 255 of objects and scenes for NSSI are planned to be photographed: objects that are frequently used for  
17  
18 256 NSSI by BPD patients (self-injury objects; SIO), scenic presentation of usage shortly before the injury  
19  
20 257 (SIO<sub>bi</sub>), and scenic presentation during the usage of SIO (SIO<sub>dur</sub>). SIO's will be selected based on the  
21  
22 258 prevalence of usage decided from psychiatrists' expertise and on the existing literature (Brown et  
23  
24 259 al., 2018; E David Klonsky, 2007; Jennifer Svaldi, Christina Dorn, Swantje Matthies, & Alexandra  
25  
26 260 Philipsen, 2012). Actors that are instructed by the experimenters will play the mimicking of the  
27  
28 261 usage of SIO's. Here, only the arms will be visible. Each image that involves body-parts will be acted  
29  
30 262 by a man and a woman to prevent gender bias in the judgement (see Figure 2 for examples from  
31  
32 263 EPSI for the three categories of objects and scenes).

## 33 264 **Experimental Design**

34 265 Participants will be asked to watch the images and to rate their current emotion on a scale of  
35  
36 266 arousal, dominance, and valence. For this purpose, the self-assessment manikin (SAM) will be used  
37  
38 267 (Margaret M Bradley & Peter J Lang, 1994). As control images to the SIO images, neutral objects  
39  
40 268 (e.g., tools) will be shown (see Figure 1 for examples of neutral images). The neutral images will be  
41  
42 269 taken from an existing and validated image database (Blechert, Meule, Busch, & Ohla, 2014). After  
43  
44 270 half of the stimuli, a break will be done to check for the emotional status of the participants to assess  
45  
46 271 and to prevent dissociations (Jaeger et al., 2017). Image presentation will be pseudorandomized  
47  
48 272 across all categories. In order to prevent decomposition of the patients to the content of the stimuli,  
49  
50 273 the patients will be monitored during the whole session by a therapist to intervene when necessary.  
51  
52 274 In total 90 images will be shown (45 EPSI/ 45 neutral) each shown for 500ms followed by the  
53  
54 275 judgement of the SAM. judgement of the SAM (see Figure 3 for the study design).

55  
56 276 *-Please insert Figure1-*

57  
58 277 **Figure 1.** *Examples of neutral pictures from food-pics: an image database for experimental research on eating and appetite*

59  
60 278

1  
2  
3 279 *-Please insert Figure2-*

4  
5 280  
6  
7 281 **Figure 2.** Examples from EPSI for the three categories of objects and scenes for NSSI. From first in a row: objects that are frequently used for  
8 282 NSSI by BPD patients (self-injury objects; SIO), scenic presentation of usage shortly before the injury (SIO<sub>bi</sub>), and scenic presentation during  
9 283 the usage of SIO (SIO<sub>dur</sub>).

10  
11  
12 284

## 15 285 **Physiological Measurement**

### 16 286 **Autonomic nervous system**

17  
18  
19 287 Assessment of the heart rate variability (HRV) is a valid and reliable indicator of the Autonomic  
20 288 Nervous System (ANS) and is considered as a transdiagnostic marker of psychopathology (Koenig et  
21 289 al., 2017; Wilson et al., 2016). Heart rate will be continuously recorded with an EC-12R rest-ecg.  
22  
23 290 Three electrodes will be attached according to Einthoven's triangle plus a ground at the right lower  
24 291 limb (Einthoven, Fahr, & De Waart, 1913). HRV will be derived through a frequency domain analysis  
25  
26 292 by taking the time-domain representation of the inter-beat-interval (IBI) and to convert it with a  
27 293 Fourier transformation to the frequency domain (Allen, Chambers, & Towers, 2007). Since we aim a  
28  
29 294 recording of time at the length of the experiment, the ECG measurement can be considered as a  
30  
31 295 short-term recording. Hence, the low-frequency band (LF; 0.04-0.15 Hz) and the high-frequency  
32 296 band (HF; 0.15-0.4 Hz) will be the frequencies of interest (Thayer, Hansen, & Johnsen, 2010).

### 33 34 35 297 **Emotional face activation**

36  
37  
38 298 The universal emotions happy, sad, angry, surprised, scared, disgusted and neutral as they were  
39 299 proposed by Ekman (Ekman & Keltner, 1970) will be measured with Noldus FaceReader software  
40 300 (Noldus Information Technology, www.noldus.com). The program detects facial expressions  
41 301 reliably and was successfully applied in numerous studies (Boerner, Chambers, McGrath, LoLordo,  
42 302 & Uher, 2017; Dalton, Jimenez, & Noussair, 2017). Throughout the whole session, the participants  
43 303 will be videotaped with a webcam. A frame-by-frame analysis will be done by the software. Over  
44 304 500 key points of the participant's face are localized and compared to a database of annotated  
45 305 images. The intensity of the universal emotions is decoded on a scale from 0 to 1, where 0 means  
46 306 that the emotion is not present and 1 indicates an intensive emotional reaction. In addition to the  
47 307 universal emotions, the software also captures valence and arousal. Valence is calculated as the  
48 308 intensity of 'happy' minus the intensity of the negative expressions (angry, scared and disgusted)  
49  
50 309 with the highest intensity. For arousal, the mean activation over the last 60 seconds of certain

1  
2  
3 310 muscle groups in the face is subtracted from the current muscle activation. The mean of the five  
4 311 highest values results in a value of arousal.

6  
7 312 To prevent that the software has a bias towards certain expressions a calibration will be done with a  
8 313 neutral look of each participant.

10  
11 314

12  
13 315 *-Please insert Figure3-*

14  
15 316

16  
17 317

18  
19  
20 **Figure 3. Study design.**

21 318

## 22 23 319 **Statistical analysis**

### 24 25 320 **Stimulus Validation**

26  
27 321 Interrater reliability will be assessed with Krippendorff's alpha. The advantage over other statistical  
28 322 methods to assess interrater reliability is that Krippendorff's alpha allows more than two raters  
29 323 (unlike Cohen's Kappa) and also can handle missing data points (unlike Fleiss Kappa) (Zapf, Castell,  
30 324 Morawietz, & Karch, 2016). The assumption of Krippendorff's alpha is based on the observed  
31 325 disagreement corrected for disagreement by chance, which is calculable to a range of -1 to 1, where  
32 326 1 illustrates perfect agreement, 0 means no agreement beyond chance and negative values indicate  
33 327 inverse agreement (Krippendorff, 1970; Zapf et al., 2016). Bootstrapped confidence intervals will be  
34 328 used since the distribution is not known, the derivation of the correct standard error is not straight  
35 329 forward, and the type 1 error level is acceptable (McKenzie et al., 1996; Vanbelle & Albert, 2008;  
36 330 Zapf et al., 2016). Krippendorff's alpha will be computed for each SAM-dimension for each stimuli  
37 331 category.

### 38 39 332 **Behavioral Data**

40 333 If the data show normal distribution, a 2x3x4 between subjects analysis of variance (ANOVA) will be  
41 334 computed with the factors group, SAM-evaluation and stimuli category. Further, the questionnaire-  
42 335 scores will be correlated with the SAM-evaluations for each stimulus category. To assess gender  
43 336 bias, a linear regression will be performed to rule out possible performance differences.

44  
45 337

## 338 **Physiological Data**

### 339 ***HRV***

340 Group-wise comparisons of HRV will be computed with a 2x2x4 ANOVA with the factors group,  
341 frequencies and stimuli category.

342

### 343 ***Emotional Face Activation***

344 Facial expressions will be evaluated group-wise for each of the six universal emotions and stimuli  
345 category, which results in a 2x4x6 ANOVA under the condition of normal distributed data. Besides t-  
346 testing the group difference in valence and arousal, a correlation will be calculated with the SAM  
347 dimensions of valence and arousal. This serves as a further measure of reliability of the participant's  
348 behavioral response with their physiological reaction to the stimuli.

### 349 **Sample size justification**

350 Using G\*Power to estimate the effect size, based on a fixed effects ANOVA with 30 participants per  
351 group yield in a large effect size (0.62) with a power of 0.66 (Faul, Erdfelder, Lang, & Buchner,  
352 2007). The size of the groups were derived from earlier studies that compares the affective reaction  
353 of BPS patients with healthy control while image watching (David Eddie & Marsha E Bates, 2017;  
354 Christina Sauer, Elisabeth A Arens, Malte Stopsack, Carsten Spitzer, & Sven Barnow, 2014).

### 355 **Ethics and dissemination**

356 The study will be conducted in accordance with the declaration of Helsinki in order to ensure the  
357 well-being and rights of the participants. The project has received ethical approval by the local  
358 medical ethics committee of the Carl-von-Ossietzky University of Oldenburg (registration: 2017-  
359 044). Written informed consent will be obtained from all participants. Participants will be able to  
360 withdraw from the study at any time without giving any reasons. During all measurement, medical  
361 professionals will be present. The study is registered at ClinicalTrials (URL) with the trial  
362 registration number: NCT03149926. Results of the main trial and each of the secondary endpoints  
363 will be submitted for publication in a peer-reviewed journal.

364

365 We used the SPIRIT checklist when writing our report (Chan et al., 2013)

366 **Reference**

- 367 Allen, J. J., Chambers, A. S., & Towers, D. N. (2007). The many metrics of cardiac  
368 chronotropy: A pragmatic primer and a brief comparison of metrics.  
369 *Biological psychology*, 74(2), 243-262.
- 370 Andover, M. S., & Morris, B. W. (2014). Expanding and clarifying the role of  
371 emotion regulation in nonsuicidal self-injury. *Can J Psychiatry*, 59(11),  
372 569-575. doi:10.1177/070674371405901102
- 373 APA. (2013). *Diagnostic and Statistical Manual of Mental Disorders, 5th edn.*  
374 Washington DC: Amer Psychiatric Association.
- 375 Association, A. P. (2013). *Diagnostic and Statistical Manual of Mental Disorders:*  
376 *Dsm-5*: Amer Psychiatric Pub Incorporated.
- 377 Baskin-Sommers, A. R., Hooley, J. M., Dahlgren, M. K., Gonenc, A., Yurgelun-  
378 Todd, D. A., & Gruber, S. A. (2015). Elevated Preattentive Affective  
379 Processing in Individuals with Borderline Personality Disorder: A  
380 Preliminary fMRI Study. *Front Psychol*, 6, 1866.  
381 doi:10.3389/fpsyg.2015.01866
- 382 Beck, A. T., Steer, R. A., & Brown, G. K. (1996). *BDI-II, Beck Depression*  
383 *Inventory: Manual*: Psychological Corporation.
- 384 Blechert, J., Meule, A., Busch, N. A., & Ohla, K. (2014). Food-pics: an image  
385 database for experimental research on eating and appetite. *Front*  
386 *Psychol*, 5, 617. doi:10.3389/fpsyg.2014.00617
- 387 Boerner, K. E., Chambers, C. T., McGrath, P. J., LoLordo, V., & Uher, R. (2017).  
388 The Effect of Parental Modeling on Child Pain Responses: The Role of  
389 Parent and Child Sex. *The Journal of Pain*, 18(6), 702-715.
- 390 Bradley, M. M., & Lang, P. J. (1994). Measuring emotion: the Self-Assessment  
391 Manikin and the Semantic Differential. *J Behav Ther Exp Psychiatry*,  
392 25(1), 49-59.
- 393 Bradley, M. M., & Lang, P. J. (1994). Measuring emotion: the self-assessment  
394 manikin and the semantic differential. *Journal of behavior therapy and*  
395 *experimental psychiatry*, 25(1), 49-59.
- 396 Brown, R., Fischer, T., Goldwich, A., Keller, F., Young, R., & Plener, P. (2018). #  
397 cutting: Non-suicidal self-injury (NSSI) on Instagram. *Psychological*  
398 *medicine*, 48(2), 337-346.
- 399 Chan, A. W., Tetzlaff, J. M., Gotzsche, P. C., Altman, D. G., Mann, H., Berlin, J. A., . . .  
400 . Moher, D. (2013). SPIRIT 2013 explanation and elaboration: guidance  
401 for protocols of clinical trials. *Bmj*, 346, e7586. doi:10.1136/bmj.e7586
- 402 Chapman, A. L., Gratz, K. L., & Brown, M. Z. (2006). Solving the puzzle of  
403 deliberate self-harm: the experiential avoidance model. *Behav Res Ther*,  
404 44(3), 371-394. doi:10.1016/j.brat.2005.03.005



- 1  
2  
3 405 Cullen, K. R., LaRiviere, L. L., Vizueta, N., Thomas, K. M., Hunt, R. H., Miller, M. J.,  
4 406 . . . Schulz, S. C. (2016). Brain activation in response to overt and covert  
5 407 fear and happy faces in women with borderline personality disorder.  
6 408 *Brain Imaging Behav*, 10(2), 319-331. doi:10.1007/s11682-015-9406-4  
7  
8 409 Dalton, P. S., Jimenez, V. H. G., & Noussair, C. N. (2017). Exposure to poverty  
9 410 and productivity. *PLoS One*, 12(1), e0170231.  
10  
11 411 Doering, S., Renn, D., Höfer, S., Rumpold, G., Smrekar, U., Janecke, N., . . .  
12 412 Schüßler, G. (2007). Validierung der deutschen Version des Fragebogens  
13 413 zur Erfassung von DSM-IV Persönlichkeitsstörungen (ADP-IV).  
14 414 *Zeitschrift für Psychosomatische Medizin und Psychotherapie*, 53(2), 111-  
15 415 128.  
16  
17 416 Eddie, D., & Bates, M. E. (2017). Toward validation of a borderline personality  
18 417 disorder-relevant picture set. *Personal Disord*, 8(3), 255-260.  
19 418 doi:10.1037/per0000173  
20  
21 419 Eddie, D., & Bates, M. E. (2017). Toward validation of a borderline personality  
22 420 disorder-relevant picture set. *Personality Disorders: Theory, Research,*  
23 421 *and Treatment*, 8(3), 255.  
24  
25 422 Einthoven, W., Fahr, G., & De Waart, A. (1913). Über die Richtung und die  
26 423 manifeste Grösse der Potentialschwankungen im menschlichen Herzen  
27 424 und über den Einfluss der Herzlage auf die Form des  
28 425 Elektrokardiogramms. *Pflügers Archiv European Journal of Physiology*,  
29 426 150(6), 275-315.  
30  
31 427 Ekman, P., & Keltner, D. (1970). Universal facial expressions of emotion.  
32 428 *California mental health research digest*, 8(4), 151-158.  
33  
34 429 Faul, F., Erdfelder, E., Lang, A.-G., & Buchner, A. (2007). G\* Power 3: A flexible  
35 430 statistical power analysis program for the social, behavioral, and  
36 431 biomedical sciences. *Behavior research methods*, 39(2), 175-191.  
37  
38 432 Favazza, A. R. (1998). The coming of age of self-mutilation. *J Nerv Ment Dis*,  
39 433 186(5), 259-268.  
40  
41 434 Feliu-Soler, A., Pascual, J. C., Soler, J., Pérez, V., Armario, A., Carrasco, J., . . .  
42 435 Borràs, X. (2013). Emotional responses to a negative emotion induction  
43 436 procedure in Borderline Personality Disorder. *International Journal of*  
44 437 *Clinical and Health Psychology*, 13(1), 9-17.  
45 438 doi:[https://doi.org/10.1016/S1697-2600\(13\)70002-4](https://doi.org/10.1016/S1697-2600(13)70002-4)  
46  
47 439 Franke, G. H. (2002). *Symptom-Checkliste von Derogatis (SCL-90-R)*: Beltz Test.  
48 440 Glenn, C. R., & Klonsky, E. D. (2010). The role of seeing blood in non-suicidal  
49 441 self-injury. *J Clin Psychol*, 66(4), 466-473. doi:10.1002/jclp.20661  
50  
51 442 Gutierrez, P. M., Osman, A., Barrios, F. X., & Kopper, B. A. (2001). Development  
52 443 and initial validation of the Self-Harm Behavior Questionnaire. *Journal of*  
53 444 *Personality Assessment*, 77(3), 475-490.

- 1  
2  
3 445 Hazlett, E. A., Zhang, J., New, A. S., Zelmanova, Y., Goldstein, K. E., Haznedar, M.  
4 446 M., . . . Chu, K. W. (2012). Potentiated amygdala response to repeated  
5 447 emotional pictures in borderline personality disorder. *Biol Psychiatry*,  
6 448 72(6), 448-456. doi:10.1016/j.biopsych.2012.03.027  
7  
8 449 Jaeger, S., Steinert, T., Uhlmann, C., Flammer, E., Bichescu-Burian, D., &  
9 450 Tschöke, S. (2017). Dissociation in patients with borderline personality  
10 451 disorder in acute inpatient care—A latent profile analysis. *Comprehensive*  
11 452 *psychiatry*, 78, 67-75.  
12  
13 453 Klonsky, E. D. (2007). The functions of deliberate self-injury: A review of the  
14 454 evidence. *Clinical psychology review*, 27(2), 226-239.  
15  
16 455 Klonsky, E. D. (2007). The functions of deliberate self-injury: a review of the  
17 456 evidence. *Clin Psychol Rev*, 27(2), 226-239.  
18 457 doi:10.1016/j.cpr.2006.08.002  
19  
20 458 Klonsky, E. D., & Glenn, C. R. (2009). Assessing the functions of non-suicidal  
21 459 self-injury: Psychometric properties of the Inventory of Statements  
22 460 About Self-injury (ISAS). *Journal of Psychopathology and Behavioral*  
23 461 *Assessment*, 31(3), 215-219.  
24  
25 462 Koenig, J., Rinnewitz, L., Parzer, P., Resch, F., Thayer, J. F., & Kaess, M. (2017).  
26 463 Resting cardiac function in adolescent non-suicidal self-injury: the  
27 464 impact of borderline personality disorder symptoms and psychosocial  
28 465 functioning. *Psychiatry research*, 248, 117-120.  
29  
30 466 Koenigsberg, H. W., Fan, J., Ochsner, K. N., Liu, X., Guise, K. G., Pizzarello, S., . . .  
31 467 Siever, L. J. (2009). Neural correlates of the use of psychological  
32 468 distancing to regulate responses to negative social cues: a study of  
33 469 patients with borderline personality disorder. *Biol Psychiatry*, 66(9),  
34 470 854-863. doi:10.1016/j.biopsych.2009.06.010  
35  
36 471 Kraus, A., Valerius, G., Seifritz, E., Ruf, M., Bremner, J. D., Bohus, M., & Schmahl,  
37 472 C. (2010). Script-driven imagery of self-injurious behavior in patients  
38 473 with borderline personality disorder: a pilot fMRI study. *Acta Psychiatr*  
39 474 *Scand*, 121(1), 41-51. doi:10.1111/j.1600-0447.2009.01417.x  
40  
41 475 Krippendorff, K. (1970). Estimating the reliability, systematic error and  
42 476 random error of interval data. *Educational and Psychological*  
43 477 *Measurement*, 30(1), 61-70.  
44  
45 478 Kučera, D., & Haviger, J. (2012). Using Mood Induction Procedures in  
46 479 Psychological Research. *Procedia - Social and Behavioral Sciences*,  
47 480 69(Supplement C), 31-40.  
48 481 doi:<https://doi.org/10.1016/j.sbspro.2012.11.380>  
49  
50 482 Kuo, J. R., & Linehan, M. M. (2009). Disentangling emotion processes in  
51 483 borderline personality disorder: physiological and self-reported  
52 484 assessment of biological vulnerability, baseline intensity, and reactivity

- 1  
2  
3 485 to emotionally evocative stimuli. *J Abnorm Psychol*, 118(3), 531-544.  
4 486 doi:10.1037/a0016392
- 5  
6 487 Lieb, K., Zanarini, M. C., Schmahl, C., Linehan, M. M., & Bohus, M. (2004).  
7 488 Borderline personality disorder. *Lancet*, 364(9432), 453-461.  
8 489 doi:10.1016/s0140-6736(04)16770-6
- 9  
10 490 Linehan, M. (1993). *Cognitive-behavioral Treatment of Borderline Personality*  
11 491 *Disorder*: Guilford Publications.
- 12  
13 492 Lobbestael, J., & Arntz, A. (2015). Emotional hyperreactivity in response to  
14 493 childhood abuse by primary caregivers in patients with borderline  
15 494 personality disorder. *J Behav Ther Exp Psychiatry*, 48, 125-132.  
16 495 doi:10.1016/j.jbtep.2015.03.005
- 17  
18 496 McKenzie, D. P., Mackinnon, A. J., Péladeau, N., Onghena, P., Bruce, P. C., Clarke,  
19 497 D. M., . . . McGorry, P. D. (1996). Comparing correlated kappas by  
20 498 resampling: Is one level of agreement significantly different from  
21 499 another? *Journal of psychiatric research*, 30(6), 483-492.
- 22  
23 500 Naoum, J., Reitz, S., Krause-Utz, A., Kleindienst, N., Willis, F., Kuniss, S., . . .  
24 501 Schmahl, C. (2016). The role of seeing blood in non-suicidal self-injury in  
25 502 female patients with borderline personality disorder. *Psychiatry Res*,  
26 503 246, 676-682. doi:10.1016/j.psychres.2016.10.066
- 27  
28 504 Nock, M. K., & Prinstein, M. J. (2004). A functional approach to the assessment  
29 505 of self-mutilative behavior. *J Consult Clin Psychol*, 72(5), 885-890.  
30 506 doi:10.1037/0022-006x.72.5.885
- 31  
32 507 Oldfield, R. C. (1971). The assessment and analysis of handedness: the  
33 508 Edinburgh inventory. *Neuropsychologia*, 9(1), 97-113.
- 34  
35 509 Philippot, P., Schaefer, A., & Herbet, G. (2003). Consequences of specific  
36 510 processing of emotional information: Impact of general versus specific  
37 511 autobiographical memory priming on emotion elicitation. *Emotion*, 3(3),  
38 512 270-283. doi:10.1037/1528-3542.3.3.270
- 39  
40 513 Reitz, S., Kluetsch, R., Niedtfeld, I., Knorz, T., Lis, S., Paret, C., . . . Schmahl, C.  
41 514 (2015). Incision and stress regulation in borderline personality  
42 515 disorder: neurobiological mechanisms of self-injurious behaviour. *Br J*  
43 516 *Psychiatry*, 207(2), 165-172. doi:10.1192/bjp.bp.114.153379
- 44  
45 517 Sauer, C., Arens, E. A., Stopsack, M., Spitzer, C., & Barnow, S. (2014). Emotional  
46 518 hyper-reactivity in borderline personality disorder is related to trauma  
47 519 and interpersonal themes. *Psychiatry Res*, 220(1-2), 468-476.  
48 520 doi:10.1016/j.psychres.2014.06.041
- 49  
50 521 Sauer, C., Arens, E. A., Stopsack, M., Spitzer, C., & Barnow, S. (2014). Emotional  
51 522 hyper-reactivity in borderline personality disorder is related to trauma  
52 523 and interpersonal themes. *Psychiatry research*, 220(1), 468-476.

- 1  
2  
3 524 Schotte, C., & De Doncker, D. (1994). ADP-IV Questionnaire. *University Hospital*  
4 525 *Antwerp, Antwerp.*
- 5  
6 526 Sloan, D. M., Sege, C. T., McSweeney, L. B., Suvak, M. K., Shea, M. T., & Litz, B. T.  
7 527 (2010). Development of a borderline personality disorder-relevant  
8 528 picture stimulus set. *J Pers Disord, 24*(5), 664-675.  
9 529 doi:10.1521/pedi.2010.24.5.664
- 10  
11 530 Stiglmayr, C. E., Braakmann, D., Haaf, B., Stieglitz, R.-D., & Bohus, M. (2003).  
12 531 Entwicklung und psychometrische Charakteristika der Dissoziations-  
13 532 Spannungs-Skala akut (DSS-akut). *PPmP-Psychotherapie· Psychosomatik·*  
14 533 *Medizinische Psychologie, 53*(07), 287-294.
- 15  
16  
17 534 Suvak, M. K., Sege, C. T., Sloan, D. M., Shea, M. T., Yen, S., & Litz, B. T. (2012).  
18 535 Emotional Processing in Borderline Personality Disorder. *Personality*  
19 536 *disorders, 3*(3), 273-282. doi:10.1037/a0027331
- 20  
21 537 Svaldi, J., Dorn, C., Matthies, S., & Philipsen, A. (2012). Effects of suppression  
22 538 and acceptance of sadness on the urge for non-suicidal self-injury and  
23 539 self-punishment. *Psychiatry research, 200*(2), 404-416.
- 24  
25 540 Svaldi, J., Dorn, C., Matthies, S., & Philipsen, A. (2012). Effects of suppression  
26 541 and acceptance of sadness on the urge for non-suicidal self-injury and  
27 542 self-punishment. *Psychiatry Res, 200*(2-3), 404-416.  
28 543 doi:10.1016/j.psychres.2012.06.030
- 29  
30  
31 544 Thayer, J. F., Hansen, A. L., & Johnsen, B. H. (2010). The non-invasive  
32 545 assessment of autonomic influences on the heart using impedance  
33 546 cardiography and heart rate variability *Handbook of behavioral medicine*  
34 547 (pp. 723-740): Springer.
- 35  
36 548 van Zutphen, L., Siep, N., Jacob, G. A., Goebel, R., & Arntz, A. (2015). Emotional  
37 549 sensitivity, emotion regulation and impulsivity in borderline personality  
38 550 disorder: a critical review of fMRI studies. *Neurosci Biobehav Rev, 51*, 64-  
39 551 76. doi:10.1016/j.neubiorev.2015.01.001
- 40  
41 552 Vanbelle, S., & Albert, A. (2008). A bootstrap method for comparing correlated  
42 553 kappa coefficients. *Journal of Statistical Computation and Simulation,*  
43 554 *78*(11), 1009-1015.
- 44  
45  
46 555 Victor, S. E., & Klonsky, E. D. (2014). Daily emotion in non-suicidal self-injury. *J*  
47 556 *Clin Psychol, 70*(4), 364-375. doi:10.1002/jclp.22037
- 48  
49 557 Wilson, S. T., Chesin, M., Fertuck, E., Keilp, J., Brodsky, B., Mann, J. J., . . . Stanley,  
50 558 B. (2016). Heart rate variability and suicidal behavior. *Psychiatry*  
51 559 *research, 240*, 241-247.
- 52  
53 560 Wittchen, H.-U., Wunderlich, U., Gruschwitz, S., & Zaudig, M. (1997). SKID I.  
54 561 Strukturiertes Klinisches Interview für DSM-IV. Achse I: Psychische  
55 562 Störungen. Interviewheft und Beurteilungsheft. Eine deutschsprachige,  
56 563 erweiterte Bearb. d. amerikanischen Originalversion des SKID I.

- 1  
2  
3 564 Wolf, M., Limberger, M., Kleindienst, N., Stieglitz, R., Domsalla, M., Philipsen, A.,  
4 565 & Steil, R. (2009). Kurzversion der Borderline-Symptom-Liste (BSL-23):  
5 566 Entwicklung und Überprüfung der psychometrischen Eigenschaften.  
6 567 Psychiatrie, Psychosomatik und Medizinische Psychologie. *Psychother*  
7 568 *Psychosom Med Psychol*, 59, 321-324.
- 10 569 Zanarini, M. C., Frankenburg, F. R., Reich, D. B., Fitzmaurice, G., Weinberg, I., &  
11 570 Gunderson, J. G. (2008). The 10-year course of physically self-destructive  
12 571 acts reported by borderline patients and axis II comparison subjects.  
13 572 *Acta Psychiatr Scand*, 117(3), 177-184. doi:10.1111/j.1600-  
14 573 0447.2008.01155.x
- 17 574 Zapf, A., Castell, S., Morawietz, L., & Karch, A. (2016). Measuring inter-rater  
18 575 reliability for nominal data—which coefficients and confidence intervals  
19 576 are appropriate? *BMC medical research methodology*, 16(1), 93.
- 21 577 Zetterqvist, M. (2015). The DSM-5 diagnosis of nonsuicidal self-injury  
22 578 disorder: a review of the empirical literature. *Child Adolesc Psychiatry*  
23 579 *Ment Health*, 9, 31. doi:10.1186/s13034-015-0062-7

25  
26 580  
27  
28  
29 581

1  
2  
3 582 **Authors' contributions**  
4

5 583 KB, MS: study design, literature search, figures, writing  
6

7 584 PS: study design, literature search, writing, supervision  
8

9  
10 585 CS: study design, supervision  
11

12 586 AP: study design, literature search, writing, supervision  
13  
14  
15

16 587 **Funding statement**  
17

18 588 This research received no specific grant from any funding agency in the public, commercial or not-  
19  
20 589 for-profit sectors.  
21  
22

23 590 **Competing interests statement**  
24

25 591 KB, MS, PS, CS declare that the research was conducted in the absence of any commercial or  
26  
27 592 financial relationships that could be construed as a potential conflict of interest.  
28

29 593 AP declares that she served on advisory boards, gave lectures, performed phase 3 studies, or  
30  
31 594 received travel grants within the last 3 years from Eli Lilly and Co, Lundbeck, MEDICE Arzneimittel,  
32  
33 595 Pütter GmbH and Co KG, Novartis, Servier, and Shire; and has authored books and articles on ADHD  
34  
35 596 published by Elsevier, Hogrefe, Schattauer, Kohlhammer, Karger, and Springer.  
36

37 597  
38

39 598  
40

41  
42 599 We used the SPIRIT checklist when writing our report (Chan et al., 2013)  
43  
44  
45  
46  
47  
48  
49  
50  
51  
52  
53  
54  
55  
56  
57

1  
2  
3  
4  
5  
6  
7  
8  
9  
10  
11  
12  
13  
14  
15  
16  
17  
18  
19  
20  
21  
22  
23  
24  
25  
26  
27  
28  
29  
30  
31  
32  
33  
34  
35  
36  
37  
38  
39  
40  
41  
42  
43  
44  
45  
46  
47  
48  
49  
50  
51  
52  
53  
54  
55  
56  
57  
58  
59  
60

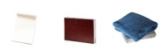

Figure 1. Examples of neutral pictures from food-pics: an image database for experimental research on eating and appetite

139x71mm (300 x 300 DPI)

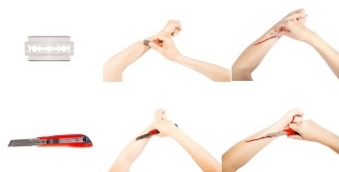

Figure 2. Examples from EPSI for the three categories of objects and scenes for NSSI. From first in a row: objects that are frequently used for NSSI by BPD patients (self-injury objects; SIO), scenic presentation of usage shortly before the injury (SIObi), and scenic presentation during the usage of SIO (SIOdur).

85x69mm (300 x 300 DPI)



1  
2  
3  
4  
5  
6  
7  
8  
9  
10  
11  
12  
13  
14  
15  
16  
17  
18  
19  
20  
21  
22  
23  
24  
25  
26  
27  
28  
29  
30  
31  
32  
33  
34  
35  
36  
37  
38  
39  
40  
41  
42  
43  
44  
45  
46  
47  
48  
49  
50  
51  
52  
53  
54  
55  
56  
57  
58  
59  
60

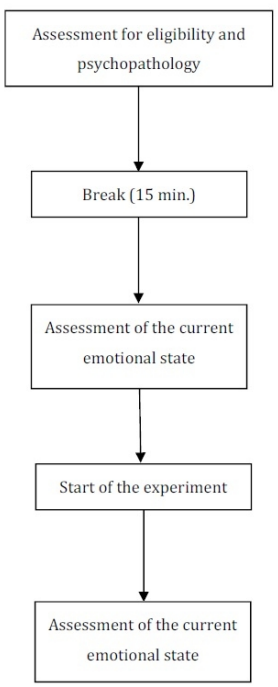

Figure 3. Study design.

92x71mm (300 x 300 DPI)

# Reporting checklist for protocol of a clinical trial.

Based on the SPIRIT guidelines.

## Instructions to authors

Complete this checklist by entering the page numbers from your manuscript where readers will find each of the items listed below.

Your article may not currently address all the items on the checklist. Please modify your text to include the missing information. If you are certain that an item does not apply, please write "n/a" and provide a short explanation.

Upload your completed checklist as an extra file when you submit to a journal.

In your methods section, say that you used the SPIRIT reporting guidelines, and cite them as:

Chan A-W, Tetzlaff JM, Altman DG, Laupacis A, Gøtzsche PC, Krleža-Jerić K, Hróbjartsson A, Mann H, Dickersin K, Berlin J, Doré C, Parulekar W, Summerskill W, Groves T, Schulz K, Sox H, Rockhold FW, Rennie D, Moher D. SPIRIT 2013 Statement: Defining standard protocol items for clinical trials. *Ann Intern Med.* 2013;158(3):200-207

|                                             |                     | Reporting Item                                                                                               | Page Number |
|---------------------------------------------|---------------------|--------------------------------------------------------------------------------------------------------------|-------------|
| Title                                       | <a href="#">#1</a>  | Descriptive title identifying the study design, population, interventions, and, if applicable, trial acronym | 1           |
| Trial registration                          | <a href="#">#2a</a> | Trial identifier and registry name. If not yet registered, name of intended registry                         | 3, 15       |
| Trial registration: data set                | <a href="#">#2b</a> | All items from the World Health Organization Trial Registration Data Set                                     | n/a         |
| Protocol version                            | <a href="#">#3</a>  | Date and version identifier                                                                                  | 2           |
| Funding                                     | <a href="#">#4</a>  | Sources and types of financial, material, and other support                                                  | n/a         |
| Roles and responsibilities: contributorship | <a href="#">#5a</a> | Names, affiliations, and roles of protocol contributors                                                      | 1           |

|    |                      |                      |                                                                   |      |
|----|----------------------|----------------------|-------------------------------------------------------------------|------|
| 1  | Roles and            | <a href="#">#5b</a>  | Name and contact information for the trial sponsor                | n/a  |
| 2  | responsibilities:    |                      |                                                                   |      |
| 3  | sponsor contact      |                      |                                                                   |      |
| 4  | information          |                      |                                                                   |      |
| 5  |                      |                      |                                                                   |      |
| 6  |                      |                      |                                                                   |      |
| 7  | Roles and            | <a href="#">#5c</a>  | Role of study sponsor and funders, if any, in study design;       | n/a  |
| 8  | responsibilities:    |                      | collection, management, analysis, and interpretation of           |      |
| 9  | sponsor and funder   |                      | data; writing of the report; and the decision to submit the       |      |
| 10 |                      |                      | report for publication, including whether they will have          |      |
| 11 |                      |                      | ultimate authority over any of these activities                   |      |
| 12 |                      |                      |                                                                   |      |
| 13 |                      |                      |                                                                   |      |
| 14 |                      |                      |                                                                   |      |
| 15 | Roles and            | <a href="#">#5d</a>  | Composition, roles, and responsibilities of the coordinating      | n/a  |
| 16 | responsibilities:    |                      | centre, steering committee, endpoint adjudication                 |      |
| 17 | committees           |                      | committee, data management team, and other individuals or         |      |
| 18 |                      |                      | groups overseeing the trial, if applicable (see Item 21a for      |      |
| 19 |                      |                      | data monitoring committee)                                        |      |
| 20 |                      |                      |                                                                   |      |
| 21 |                      |                      |                                                                   |      |
| 22 |                      |                      |                                                                   |      |
| 23 |                      |                      |                                                                   |      |
| 24 | Background and       | <a href="#">#6a</a>  | Description of research question and justification for            | 5-8  |
| 25 | rationale            |                      | undertaking the trial, including summary of relevant studies      |      |
| 26 |                      |                      | (published and unpublished) examining benefits and harms          |      |
| 27 |                      |                      | for each intervention                                             |      |
| 28 |                      |                      |                                                                   |      |
| 29 |                      |                      |                                                                   |      |
| 30 |                      |                      |                                                                   |      |
| 31 | Background and       | <a href="#">#6b</a>  | Explanation for choice of comparators                             | 7-8  |
| 32 | rationale: choice of |                      |                                                                   |      |
| 33 | comparators          |                      |                                                                   |      |
| 34 |                      |                      |                                                                   |      |
| 35 |                      |                      |                                                                   |      |
| 36 | Objectives           | <a href="#">#7</a>   | Specific objectives or hypotheses                                 | 8-9  |
| 37 |                      |                      |                                                                   |      |
| 38 |                      |                      |                                                                   |      |
| 39 | Trial design         | <a href="#">#8</a>   | Description of trial design including type of trial (eg, parallel | 9-10 |
| 40 |                      |                      | group, crossover, factorial, single group), allocation ratio,     |      |
| 41 |                      |                      | and framework (eg, superiority, equivalence, non-inferiority,     |      |
| 42 |                      |                      | exploratory)                                                      |      |
| 43 |                      |                      |                                                                   |      |
| 44 |                      |                      |                                                                   |      |
| 45 |                      |                      |                                                                   |      |
| 46 | Study setting        | <a href="#">#9</a>   | Description of study settings (eg, community clinic,              | 9    |
| 47 |                      |                      | academic hospital) and list of countries where data will be       |      |
| 48 |                      |                      | collected. Reference to where list of study sites can be          |      |
| 49 |                      |                      | obtained                                                          |      |
| 50 |                      |                      |                                                                   |      |
| 51 |                      |                      |                                                                   |      |
| 52 | Eligibility criteria | <a href="#">#10</a>  | Inclusion and exclusion criteria for participants. If applicable, |      |
| 53 |                      |                      | eligibility criteria for study centres and individuals who will   |      |
| 54 |                      |                      | perform the interventions (eg, surgeons, psychotherapists)        | 9    |
| 55 |                      |                      |                                                                   |      |
| 56 |                      |                      |                                                                   |      |
| 57 |                      |                      |                                                                   |      |
| 58 | Interventions:       | <a href="#">#11a</a> | Interventions for each group with sufficient detail to allow      | 9-13 |
| 59 |                      |                      |                                                                   |      |
| 60 |                      |                      |                                                                   |      |

|    |                                 |                      |                                                                                                                                                                                                                                                                                                                                                                                |         |
|----|---------------------------------|----------------------|--------------------------------------------------------------------------------------------------------------------------------------------------------------------------------------------------------------------------------------------------------------------------------------------------------------------------------------------------------------------------------|---------|
| 1  | description                     |                      | replication, including how and when they will be administered                                                                                                                                                                                                                                                                                                                  |         |
| 2  |                                 |                      |                                                                                                                                                                                                                                                                                                                                                                                |         |
| 3  |                                 |                      |                                                                                                                                                                                                                                                                                                                                                                                |         |
| 4  | Interventions:                  | <a href="#">#11b</a> | Criteria for discontinuing or modifying allocated                                                                                                                                                                                                                                                                                                                              | 9, 10   |
| 5  | modifications                   |                      | interventions for a given trial participant (eg, drug dose change in response to harms, participant request, or improving / worsening disease)                                                                                                                                                                                                                                 |         |
| 6  |                                 |                      |                                                                                                                                                                                                                                                                                                                                                                                |         |
| 7  |                                 |                      |                                                                                                                                                                                                                                                                                                                                                                                |         |
| 8  |                                 |                      |                                                                                                                                                                                                                                                                                                                                                                                |         |
| 9  |                                 |                      |                                                                                                                                                                                                                                                                                                                                                                                |         |
| 10 | Interventions:                  | <a href="#">#11c</a> | Strategies to improve adherence to intervention protocols, and any procedures for monitoring adherence (eg, drug tablet return; laboratory tests)                                                                                                                                                                                                                              | 9, 10   |
| 11 | adherence                       |                      |                                                                                                                                                                                                                                                                                                                                                                                |         |
| 12 |                                 |                      |                                                                                                                                                                                                                                                                                                                                                                                |         |
| 13 |                                 |                      |                                                                                                                                                                                                                                                                                                                                                                                |         |
| 14 |                                 |                      |                                                                                                                                                                                                                                                                                                                                                                                |         |
| 15 |                                 |                      |                                                                                                                                                                                                                                                                                                                                                                                |         |
| 16 | Interventions:                  | <a href="#">#11d</a> | Relevant concomitant care and interventions that are permitted or prohibited during the trial                                                                                                                                                                                                                                                                                  | n/a     |
| 17 | concomitant care                |                      |                                                                                                                                                                                                                                                                                                                                                                                |         |
| 18 |                                 |                      |                                                                                                                                                                                                                                                                                                                                                                                |         |
| 19 |                                 |                      |                                                                                                                                                                                                                                                                                                                                                                                |         |
| 20 | Outcomes                        | <a href="#">#12</a>  | Primary, secondary, and other outcomes, including the specific measurement variable (eg, systolic blood pressure), analysis metric (eg, change from baseline, final value, time to event), method of aggregation (eg, median, proportion), and time point for each outcome. Explanation of the clinical relevance of chosen efficacy and harm outcomes is strongly recommended | 8,11,12 |
| 21 |                                 |                      |                                                                                                                                                                                                                                                                                                                                                                                |         |
| 22 |                                 |                      |                                                                                                                                                                                                                                                                                                                                                                                |         |
| 23 |                                 |                      |                                                                                                                                                                                                                                                                                                                                                                                |         |
| 24 |                                 |                      |                                                                                                                                                                                                                                                                                                                                                                                |         |
| 25 |                                 |                      |                                                                                                                                                                                                                                                                                                                                                                                |         |
| 26 |                                 |                      |                                                                                                                                                                                                                                                                                                                                                                                |         |
| 27 |                                 |                      |                                                                                                                                                                                                                                                                                                                                                                                |         |
| 28 |                                 |                      |                                                                                                                                                                                                                                                                                                                                                                                |         |
| 29 |                                 |                      |                                                                                                                                                                                                                                                                                                                                                                                |         |
| 30 |                                 |                      |                                                                                                                                                                                                                                                                                                                                                                                |         |
| 31 | Participant timeline            | <a href="#">#13</a>  | Time schedule of enrolment, interventions (including any run-ins and washouts), assessments, and visits for participants. A schematic diagram is highly recommended (see Figure)                                                                                                                                                                                               | 13      |
| 32 |                                 |                      |                                                                                                                                                                                                                                                                                                                                                                                |         |
| 33 |                                 |                      |                                                                                                                                                                                                                                                                                                                                                                                |         |
| 34 |                                 |                      |                                                                                                                                                                                                                                                                                                                                                                                |         |
| 35 |                                 |                      |                                                                                                                                                                                                                                                                                                                                                                                |         |
| 36 |                                 |                      |                                                                                                                                                                                                                                                                                                                                                                                |         |
| 37 |                                 |                      |                                                                                                                                                                                                                                                                                                                                                                                |         |
| 38 | Sample size                     | <a href="#">#14</a>  | Estimated number of participants needed to achieve study objectives and how it was determined, including clinical and statistical assumptions supporting any sample size calculations                                                                                                                                                                                          | 14      |
| 39 |                                 |                      |                                                                                                                                                                                                                                                                                                                                                                                |         |
| 40 |                                 |                      |                                                                                                                                                                                                                                                                                                                                                                                |         |
| 41 |                                 |                      |                                                                                                                                                                                                                                                                                                                                                                                |         |
| 42 |                                 |                      |                                                                                                                                                                                                                                                                                                                                                                                |         |
| 43 |                                 |                      |                                                                                                                                                                                                                                                                                                                                                                                |         |
| 44 |                                 |                      |                                                                                                                                                                                                                                                                                                                                                                                |         |
| 45 | Recruitment                     | <a href="#">#15</a>  | Strategies for achieving adequate participant enrolment to reach target sample size                                                                                                                                                                                                                                                                                            | 9,14    |
| 46 |                                 |                      |                                                                                                                                                                                                                                                                                                                                                                                |         |
| 47 |                                 |                      |                                                                                                                                                                                                                                                                                                                                                                                |         |
| 48 |                                 |                      |                                                                                                                                                                                                                                                                                                                                                                                |         |
| 49 | Allocation: sequence generation | <a href="#">#16a</a> | Method of generating the allocation sequence (eg, computer-generated random numbers), and list of any factors for stratification. To reduce predictability of a random sequence, details of any planned restriction (eg, blocking) should be provided in a separate document that is unavailable to those who enrol participants or assign interventions                       | n/a     |
| 50 |                                 |                      |                                                                                                                                                                                                                                                                                                                                                                                |         |
| 51 |                                 |                      |                                                                                                                                                                                                                                                                                                                                                                                |         |
| 52 |                                 |                      |                                                                                                                                                                                                                                                                                                                                                                                |         |
| 53 |                                 |                      |                                                                                                                                                                                                                                                                                                                                                                                |         |
| 54 |                                 |                      |                                                                                                                                                                                                                                                                                                                                                                                |         |
| 55 |                                 |                      |                                                                                                                                                                                                                                                                                                                                                                                |         |
| 56 |                                 |                      |                                                                                                                                                                                                                                                                                                                                                                                |         |
| 57 |                                 |                      |                                                                                                                                                                                                                                                                                                                                                                                |         |
| 58 |                                 |                      |                                                                                                                                                                                                                                                                                                                                                                                |         |
| 59 |                                 |                      |                                                                                                                                                                                                                                                                                                                                                                                |         |
| 60 |                                 |                      |                                                                                                                                                                                                                                                                                                                                                                                |         |

|    |                        |                      |                                                                |        |
|----|------------------------|----------------------|----------------------------------------------------------------|--------|
| 1  | Allocation             | <a href="#">#16b</a> | Mechanism of implementing the allocation sequence (eg,         | n/a    |
| 2  | concealment            |                      | central telephone; sequentially numbered, opaque, sealed       |        |
| 3  | mechanism              |                      | envelopes), describing any steps to conceal the sequence       |        |
| 4  |                        |                      | until interventions are assigned                               |        |
| 5  |                        |                      |                                                                |        |
| 6  |                        |                      |                                                                |        |
| 7  | Allocation:            | <a href="#">#16c</a> | Who will generate the allocation sequence, who will enrol      | n/a    |
| 8  | implementation         |                      | participants, and who will assign participants to              |        |
| 9  |                        |                      | interventions                                                  |        |
| 10 |                        |                      |                                                                |        |
| 11 |                        |                      |                                                                |        |
| 12 |                        |                      |                                                                |        |
| 13 | Blinding (masking)     | <a href="#">#17a</a> | Who will be blinded after assignment to interventions (eg,     | n/a    |
| 14 |                        |                      | trial participants, care providers, outcome assessors, data    |        |
| 15 |                        |                      | analysts), and how                                             |        |
| 16 |                        |                      |                                                                |        |
| 17 |                        |                      |                                                                |        |
| 18 | Blinding (masking):    | <a href="#">#17b</a> | If blinded, circumstances under which unblinding is            | n/a    |
| 19 | emergency              |                      | permissible, and procedure for revealing a participant's       |        |
| 20 | unblinding             |                      | allocated intervention during the trial                        |        |
| 21 |                        |                      |                                                                |        |
| 22 |                        |                      |                                                                |        |
| 23 |                        |                      |                                                                |        |
| 24 | Data collection plan   | <a href="#">#18a</a> | Plans for assessment and collection of outcome, baseline,      | 9 – 11 |
| 25 |                        |                      | and other trial data, including any related processes to       |        |
| 26 |                        |                      | promote data quality (eg, duplicate measurements, training     |        |
| 27 |                        |                      | of assessors) and a description of study instruments (eg,      |        |
| 28 |                        |                      | questionnaires, laboratory tests) along with their reliability |        |
| 29 |                        |                      | and validity, if known. Reference to where data collection     |        |
| 30 |                        |                      | forms can be found, if not in the protocol                     |        |
| 31 |                        |                      |                                                                |        |
| 32 |                        |                      |                                                                |        |
| 33 |                        |                      |                                                                |        |
| 34 |                        |                      |                                                                |        |
| 35 | Data collection plan:  | <a href="#">#18b</a> | Plans to promote participant retention and complete follow-    | 9-11   |
| 36 | retention              |                      | up, including list of any outcome data to be collected for     |        |
| 37 |                        |                      | participants who discontinue or deviate from intervention      |        |
| 38 |                        |                      | protocols                                                      |        |
| 39 |                        |                      |                                                                |        |
| 40 |                        |                      |                                                                |        |
| 41 |                        |                      |                                                                |        |
| 42 | Data management        | <a href="#">#19</a>  | Plans for data entry, coding, security, and storage, including | 11-14  |
| 43 |                        |                      | any related processes to promote data quality (eg, double      |        |
| 44 |                        |                      | data entry; range checks for data values). Reference to        |        |
| 45 |                        |                      | where details of data management procedures can be             |        |
| 46 |                        |                      | found, if not in the protocol                                  |        |
| 47 |                        |                      |                                                                |        |
| 48 |                        |                      |                                                                |        |
| 49 |                        |                      |                                                                |        |
| 50 | Statistics: outcomes   | <a href="#">#20a</a> | Statistical methods for analysing primary and secondary        | 13-14  |
| 51 |                        |                      | outcomes. Reference to where other details of the statistical  |        |
| 52 |                        |                      | analysis plan can be found, if not in the protocol             |        |
| 53 |                        |                      |                                                                |        |
| 54 |                        |                      |                                                                |        |
| 55 | Statistics: additional | <a href="#">#20b</a> | Methods for any additional analyses (eg, subgroup and          | 14     |
| 56 | analyses               |                      | adjusted analyses)                                             |        |
| 57 |                        |                      |                                                                |        |
| 58 |                        |                      |                                                                |        |
| 59 |                        |                      |                                                                |        |
| 60 |                        |                      |                                                                |        |

|    |                      |                      |                                                                  |     |
|----|----------------------|----------------------|------------------------------------------------------------------|-----|
| 1  | Statistics: analysis | <a href="#">#20c</a> | Definition of analysis population relating to protocol non-      | 14  |
| 2  | population and       |                      | adherence (eg, as randomised analysis), and any statistical      |     |
| 3  | missing data         |                      | methods to handle missing data (eg, multiple imputation)         |     |
| 4  |                      |                      |                                                                  |     |
| 5  |                      |                      |                                                                  |     |
| 6  | Data monitoring:     | <a href="#">#21a</a> | Composition of data monitoring committee (DMC); summary          | n/a |
| 7  | formal committee     |                      | of its role and reporting structure; statement of whether it is  |     |
| 8  |                      |                      | independent from the sponsor and competing interests; and        |     |
| 9  |                      |                      | reference to where further details about its charter can be      |     |
| 10 |                      |                      | found, if not in the protocol. Alternatively, an explanation of  |     |
| 11 |                      |                      | why a DMC is not needed                                          |     |
| 12 |                      |                      |                                                                  |     |
| 13 |                      |                      |                                                                  |     |
| 14 |                      |                      |                                                                  |     |
| 15 |                      |                      |                                                                  |     |
| 16 | Data monitoring:     | <a href="#">#21b</a> | Description of any interim analyses and stopping guidelines,     | n/a |
| 17 | interim analysis     |                      | including who will have access to these interim results and      |     |
| 18 |                      |                      | make the final decision to terminate the trial                   |     |
| 19 |                      |                      |                                                                  |     |
| 20 |                      |                      |                                                                  |     |
| 21 | Harms                | <a href="#">#22</a>  | Plans for collecting, assessing, reporting, and managing         | 10  |
| 22 |                      |                      | solicited and spontaneously reported adverse events and          |     |
| 23 |                      |                      | other unintended effects of trial interventions or trial conduct |     |
| 24 |                      |                      |                                                                  |     |
| 25 |                      |                      |                                                                  |     |
| 26 |                      |                      |                                                                  |     |
| 27 | Auditing             | <a href="#">#23</a>  | Frequency and procedures for auditing trial conduct, if any,     | n/a |
| 28 |                      |                      | and whether the process will be independent from                 |     |
| 29 |                      |                      | investigators and the sponsor                                    |     |
| 30 |                      |                      |                                                                  |     |
| 31 |                      |                      |                                                                  |     |
| 32 | Research ethics      | <a href="#">#24</a>  | Plans for seeking research ethics committee / institutional      | 3   |
| 33 | approval             |                      | review board (REC / IRB) approval                                |     |
| 34 |                      |                      |                                                                  |     |
| 35 |                      |                      |                                                                  |     |
| 36 | Protocol             | <a href="#">#25</a>  | Plans for communicating important protocol modifications         | n/a |
| 37 | amendments           |                      | (eg, changes to eligibility criteria, outcomes, analyses) to     |     |
| 38 |                      |                      | relevant parties (eg, investigators, REC / IRBs, trial           |     |
| 39 |                      |                      | participants, trial registries, journals, regulators)            |     |
| 40 |                      |                      |                                                                  |     |
| 41 |                      |                      |                                                                  |     |
| 42 |                      |                      |                                                                  |     |
| 43 | Consent or assent    | <a href="#">#26a</a> | Who will obtain informed consent or assent from potential        | 15  |
| 44 |                      |                      | trial participants or authorised surrogates, and how (see        |     |
| 45 |                      |                      | Item 32)                                                         |     |
| 46 |                      |                      |                                                                  |     |
| 47 |                      |                      |                                                                  |     |
| 48 | Consent or assent:   | <a href="#">#26b</a> | Additional consent provisions for collection and use of          | n/a |
| 49 | ancillary studies    |                      | participant data and biological specimens in ancillary           |     |
| 50 |                      |                      | studies, if applicable                                           |     |
| 51 |                      |                      |                                                                  |     |
| 52 |                      |                      |                                                                  |     |
| 53 | Confidentiality      | <a href="#">#27</a>  | How personal information about potential and enrolled            | 9   |
| 54 |                      |                      | participants will be collected, shared, and maintained in        |     |
| 55 |                      |                      | order to protect confidentiality before, during, and after the   |     |
| 56 |                      |                      | trial                                                            |     |
| 57 |                      |                      |                                                                  |     |
| 58 |                      |                      |                                                                  |     |
| 59 |                      |                      |                                                                  |     |
| 60 |                      |                      |                                                                  |     |

|    |                       |                      |                                                                 |     |
|----|-----------------------|----------------------|-----------------------------------------------------------------|-----|
| 1  | Declaration of        | <a href="#">#28</a>  | Financial and other competing interests for principal           | 22  |
| 2  | interests             |                      | investigators for the overall trial and each study site         |     |
| 3  |                       |                      |                                                                 |     |
| 4  | Data access           | <a href="#">#29</a>  | Statement of who will have access to the final trial dataset,   | n/a |
| 5  |                       |                      | and disclosure of contractual agreements that limit such        |     |
| 6  |                       |                      | access for investigators                                        |     |
| 7  |                       |                      |                                                                 |     |
| 8  |                       |                      |                                                                 |     |
| 9  |                       |                      |                                                                 |     |
| 10 | Ancillary and post    | <a href="#">#30</a>  | Provisions, if any, for ancillary and post-trial care, and for  | n/a |
| 11 | trial care            |                      | compensation to those who suffer harm from trial                |     |
| 12 |                       |                      | participation                                                   |     |
| 13 |                       |                      |                                                                 |     |
| 14 |                       |                      |                                                                 |     |
| 15 | Dissemination policy: | <a href="#">#31a</a> | Plans for investigators and sponsor to communicate trial        | 15  |
| 16 | trial results         |                      | results to participants, healthcare professionals, the public,  |     |
| 17 |                       |                      | and other relevant groups (eg, via publication, reporting in    |     |
| 18 |                       |                      | results databases, or other data sharing arrangements),         |     |
| 19 |                       |                      | including any publication restrictions                          |     |
| 20 |                       |                      |                                                                 |     |
| 21 |                       |                      |                                                                 |     |
| 22 |                       |                      |                                                                 |     |
| 23 |                       |                      |                                                                 |     |
| 24 | Dissemination policy: | <a href="#">#31b</a> | Authorship eligibility guidelines and any intended use of       | n/a |
| 25 | authorship            |                      | professional writers                                            |     |
| 26 |                       |                      |                                                                 |     |
| 27 | Dissemination policy: | <a href="#">#31c</a> | Plans, if any, for granting public access to the full protocol, | n/a |
| 28 | reproducible          |                      | participant-level dataset, and statistical code                 |     |
| 29 | research              |                      |                                                                 |     |
| 30 |                       |                      |                                                                 |     |
| 31 |                       |                      |                                                                 |     |
| 32 |                       |                      |                                                                 |     |
| 33 | Informed consent      | <a href="#">#32</a>  | Model consent form and other related documentation given        | 15  |
| 34 | materials             |                      | to participants and authorised surrogates                       |     |
| 35 |                       |                      |                                                                 |     |
| 36 |                       |                      |                                                                 |     |
| 37 | Biological specimens  | <a href="#">#33</a>  | Plans for collection, laboratory evaluation, and storage of     | n/a |
| 38 |                       |                      | biological specimens for genetic or molecular analysis in the   |     |
| 39 |                       |                      | current trial and for future use in ancillary studies, if       |     |
| 40 |                       |                      | applicable                                                      |     |
| 41 |                       |                      |                                                                 |     |
| 42 |                       |                      |                                                                 |     |

43 The SPIRIT checklist is distributed under the terms of the Creative Commons Attribution License CC-  
 44 BY-ND 3.0. This checklist can be completed online using <https://www.goodreports.org/>, a tool made  
 45 by the [EQUATOR Network](#) in collaboration with [Penelope.ai](#)  
 46  
 47  
 48  
 49  
 50  
 51  
 52  
 53  
 54  
 55  
 56  
 57  
 58  
 59  
 60

# BMJ Open

## Protocol article: Development and validation of an emotional picture set of self-injury (EPSI) for borderline personality disorder

|                                 |                                                                                                                                                                                                                                                                                                                                                                                                                                                                   |
|---------------------------------|-------------------------------------------------------------------------------------------------------------------------------------------------------------------------------------------------------------------------------------------------------------------------------------------------------------------------------------------------------------------------------------------------------------------------------------------------------------------|
| Journal:                        | <i>BMJ Open</i>                                                                                                                                                                                                                                                                                                                                                                                                                                                   |
| Manuscript ID                   | bmjopen-2018-027063.R1                                                                                                                                                                                                                                                                                                                                                                                                                                            |
| Article Type:                   | Protocol                                                                                                                                                                                                                                                                                                                                                                                                                                                          |
| Date Submitted by the Author:   | 12-Jan-2019                                                                                                                                                                                                                                                                                                                                                                                                                                                       |
| Complete List of Authors:       | Bachmann, Katharina; Carl von Ossietzky Universitat Oldenburg, Schulze, Marcel; Rheinische Friedrich-Wilhelms-Universitat Bonn Sörös, Peter; University of Oldenburg Schmahl, Christian; Central Institute of Mental Health, Medical Faculty Mannheim, Heidelberg University Philipsen, Alexandra; Rheinische Friedrich-Wilhelms-Universitat Bonn, Department of Psychiatry and Psychotherapy; University of Freiburg, Faculty of Medicine University of Freiburg |
| <b>Primary Subject Heading</b>: | Medical publishing and peer review                                                                                                                                                                                                                                                                                                                                                                                                                                |
| Secondary Subject Heading:      | Mental health                                                                                                                                                                                                                                                                                                                                                                                                                                                     |
| Keywords:                       | Borderline, Emotion regulation, Emotional stimuli, NSSI                                                                                                                                                                                                                                                                                                                                                                                                           |
|                                 |                                                                                                                                                                                                                                                                                                                                                                                                                                                                   |

SCHOLARONE™  
Manuscripts



# Protocol article: Development and validation of an emotional picture set of self-injury (EPSI) for borderline personality disorder

---

Katharina Bachmann<sup>1\*</sup>, Marcel Schulze<sup>2\*</sup>, Peter Sörös<sup>3,4</sup>, Christian Schmahl<sup>5</sup>, Alexandra Philipsen<sup>2,6</sup>

<sup>1</sup> Medical Campus University of Oldenburg, School of Medicine and Health Sciences, Psychiatry and Psychotherapy – University Hospital, Karl-Jaspers-Klinik, Bad Zwischenahn, Germany

<sup>2</sup> Department of Psychiatry and Psychotherapy, University of Bonn, Bonn, Germany

<sup>3</sup> Neurology, School of Medicine and Health Sciences, University of Oldenburg, Oldenburg, Germany

<sup>4</sup> Research Center Neurosensory Science, University of Oldenburg, Oldenburg, Germany

<sup>5</sup> Department of Psychosomatic Medicine and Psychotherapy, Central Institute of Mental Health, Medical Faculty Mannheim, Heidelberg University

<sup>6</sup> Department of Psychiatry and Psychotherapy Medical Center – University of Freiburg, Faculty of Medicine University of Freiburg, Germany

\* Both authors contributed equally

1  
2  
3  
4  
5  
6  
7  
8  
9  
10  
11  
12  
13  
14  
15  
16  
17  
18  
19  
20  
21  
22  
23  
24  
25  
26  
27  
28  
29  
30  
31  
32  
33  
34  
35  
36  
37  
38  
39  
40  
41  
42  
43  
44  
45  
46  
47  
48  
49  
50  
51  
52  
53  
54  
55  
56  
57  
58  
59  
60

18 **Word count**

19  
20 Abstract: 186

21 Text: 3333

22 References: 66

23 Tables & figures: 4

24

25

26 Issue date: December 2018

27 Original

28 Authors: KB, MS, PS, CS, AP

29

30

31

32

33

34

35

36

37

38

39

40 Corresponding author:

41 Katharina Bachmann, M.Sc.

42 Medical Campus University of Oldenburg, School of Medicine and Health Sciences, Psychiatry and

43 Psychotherapy – University Hospital, Karl-Jaspers-Klinik, Bad Zwischenahn, Germany

44 Postal address: Hermann-Ehlers-Straße 7, 26160 Bad Zwischenahn, Germany.

45 Tel.: 0049-441-9615-1501

46 Fax: 0049-441-9615-1599

47 Email: Katharina.Bachmann@uni-oldenburg.de

## 48 **Abstract**

49 **Introduction:** Borderline personality disorder (BPD) is a severe psychiatric disorder that is  
50 characterized by major problems in emotion regulation. Affected persons frequently engage in non-  
51 suicidal self-injury (NSSI) to regulate emotions. NSSI is associated with high emotionality in BPD  
52 patients and it can be expected that stimuli depicting scenes of NSSI elicit an emotional response  
53 distinctive for BPD. The current study protocol describes the development and validation of an  
54 emotional picture set of self-injury (EPSI) to advance future research on emotion regulation in BPD.

55 **Methods and analysis:** The current case-controlled experiment aims to develop and validate an  
56 emotional picture set relevant for BPD. Emotional response to EPSI as well as to a neutral picture  
57 set will be investigated in a sample of 30 BPD patients compared to 30 matched, healthy controls  
58 and to 30 matched depressive controls. Emotional response will be assessed by heart rate  
59 variability (HRV), facial expression and Self-Assessment Manikin (SAM).

60 **Ethics and dissemination:** Ethics approval was obtained by the medical ethics committee of the  
61 Carl-von-Ossietzky University of Oldenburg, Germany (registration: 2017-044). Results of the trial  
62 will be submitted for publication in a peer-reviewed journal.

63 **Trial registration number:** clinicaltrials.gov: NCT03149926

64 **Keywords:** Borderline, Emotion regulation, Emotional stimuli, NSSI

65

66

67

68

69

70

71

72

73

1  
2  
3 74 **Strengths and limitations of this study**  
4

- 5 75 • Controlled study design to develop emotional stimuli relevant for BPD  
6  
7 76 • Emotional reaction is assessed by subjective as well as objective measurements  
8  
9 77 • Emotion evocation is limited to NSSI however other emotional trigger (e.g. social  
10 78 interaction) are not investigated  
11  
12 79 • Limited to BPD patients that actually engage in NSSI  
13  
14  
15 80

16  
17  
18  
19  
20  
21  
22  
23  
24  
25  
26  
27  
28  
29  
30  
31  
32  
33  
34  
35  
36  
37  
38  
39  
40  
41  
42  
43  
44  
45  
46  
47  
48  
49  
50  
51  
52  
53  
54  
55  
56  
57  
58  
59  
60

For peer review only

## 81 Introduction

82 Borderline personality disorder (BPD) is a severe psychiatric disorder that is characterized by  
83 impairments in interpersonal, cognitive, and emotional functioning<sup>1 2</sup>. Pervasive problems in affect  
84 regulation have been identified as the central area of dysfunction in BPD. BPD even has been  
85 conceptualized as a disorder of the emotion regulation system<sup>3</sup>. Emotion dysregulation comprises  
86 high emotional vulnerability in conjunction with an inability to regulate emotions. Emotional  
87 vulnerability in individuals with BPD is characterized by high sensitivity to emotional stimuli,  
88 unusual emotional intensity and a slow return to emotional baseline (emotions are long-lasting). In  
89 addition, the identification, expression, and inhibition of emotions are impaired<sup>3-5</sup>.

90 Not surprisingly, emotionally evocative material is commonly used to investigate BPD pathology.  
91 Previous studies have employed various emotional stimuli such as emotional facial expression<sup>6 7</sup>,  
92 pleasant or unpleasant pictures<sup>8 9</sup>, pictures and video clips depicting social interactions<sup>10 11</sup> or  
93 script-driven imagery of an act of self-injury<sup>12</sup>. However, research findings on emotion regulation in  
94 BPD to date are inconsistent in terms of evoking emotional responses in BPD patients<sup>13 14</sup>. While  
95 some studies did not find evidence for abnormal emotional responsiveness in BPD<sup>9 15 16</sup> others did  
96<sup>12 17 18</sup>. One possible explanation for these contradictory results might be that the stimulus material  
97 was not specific enough to elicit an emotional response in persons with BPD. For example, in a  
98 recent study that investigated difference in emotional response and specificity of the presented  
99 stimuli, baseline emotional intensity and emotional reactivity in BPD patients were compared to  
100 healthy controls. Emotional response to six discrete emotion-eliciting film clips was evaluated by  
101 means of physiological and subjective reactions. Furthermore, the two groups were compared  
102 regarding their emotional reaction to films containing content associated with BPD (e.g. sexual  
103 abuse, emotional dependence, and abandonment/separation). Compared to healthy controls,  
104 persons with BPD did not show subjectively heightened reactivity to most of the discrete emotion-  
105 eliciting films but a significantly stronger emotional response to “BPD-specific content” films<sup>18</sup>.  
106 These findings suggest that measuring emotional responses that are characteristic for BPD only  
107 make sense in contexts that are psychologically challenging<sup>9 13</sup>. The actual emergence and intensity  
108 of emotions depend on an array of psychological characteristics of the person such as personality,  
109 learning experiences and cognition, the situational context but also on the type and intensity of the  
110 perceived stimulus<sup>19</sup>. Emotional stimuli that activate specific, self-relevant information seem to  
111 arouse a more intense emotional reaction than more general emotional stimuli<sup>5 20</sup>. Therefore, to  
112 elicit a distinctive and BPD-specific emotional response the stimulus material has to have a high

1  
2  
3 113 relevance for persons with BPD and has to trigger sensitivities distinct for BPD <sup>5 9</sup>. Such a triggering  
4 114 event could be the presentation of material used for non-suicidal self-injury (NSSI).

6  
7 115 NSSI is associated with clinical and functional impairments and occurs in a variety of psychiatric  
8 116 disorders <sup>21</sup>. There is an ongoing scientific debate regarding the conceptualization and diagnostic  
9 117 organization of NSSI. The fifth version of the Diagnostic and Statistical Manual of Mental Disorders  
10 118 (DSM-5) presents Non-Suicidal Self-Injury Disorder (NSSID) as a separate nosological entity  
11 119 however as a condition that requires further investigation <sup>21 22</sup>. This shows that NSSI is not unique to  
12 120 BPD. However, there is a general consensus that NSSI is related to BPD and can be considered as a  
13 121 core symptom of the disorder <sup>1 21</sup>. NSSI is defined as the deliberate destruction of healthy body  
14 122 tissue that is not suicidal in nature. About 90% of patients with BPD do engage in NSSI <sup>23</sup>. NSSI  
15 123 typically includes repeated behaviors, such as skin cutting, banging or hitting, burning, scratching,  
16 124 and interfering with wound healing <sup>24</sup>. Emotion dysregulation is closely linked to NSSI in persons  
17 125 with BPD. According to the experiential avoidance model, NSSI is applied to reduce or remove  
18 126 aversive emotional experiences and might be maintained by negative reinforcement <sup>25-27</sup>.

19  
20  
21  
22  
23  
24  
25  
26  
27 127 Empirical evidence suggests that NSSI is commonly performed as emotion regulation strategy. Self-  
28 128 injurers use NSSI to reduce unpleasant feelings, overcome dissociation, for self-punishment or for  
29 129 the reduction of aversive inner tension <sup>28 29</sup>. Typically, NSSI is preceded by high arousal of negative  
30 130 emotions whereas NSSI behavior is associated with a decrease in these emotions <sup>29 30</sup>. For example,  
31 131 a decrease in negative affect and arousal was observed in self-injurers who were asked to visualize  
32 132 cutting or to engage in another painful behavior whereas the performance of a non-NSSI-related  
33 133 task did not lead to a decrease <sup>29</sup>. In addition, seeing blood during NSSI seems to be an important  
34 134 aspect for many self-injurers. Glenn and Klonsky <sup>31</sup> investigated the role of seeing blood during NSSI  
35 135 in persons with a history of NSSI. Most participants (51.6%) reported seeing blood during NSSI was  
36 136 important. Furthermore, participants reported that seeing blood fulfilled multiple functions, such as  
37 137 to relieve tension (84.8%), to calm down (72.7%), to feel real (51.5%), to show the realness of NSSI  
38 138 (42.4%), to help focus (33.3%), and to show that NSSI has been performed correctly/deep enough  
39 139 (15.2%). A pilot study by Naoum, et al. <sup>32</sup> compared 20 female BPD patients and 20 healthy controls  
40 140 (HC) to investigate the effect of seeing blood during NSSI following stress and pain induction. The  
41 141 BPD patients showed a significantly stronger decrease in arousal than the HC group, however with  
42 142 no significant effects between blood and non-blood conditions. In addition, the urge for NSSI,  
43 143 significantly greater decreased in the blood condition in BPD patients. Seeing blood did not result in  
44 144 greater relief of tension, though.

1  
2  
3 145 Despite the connection of deficient emotion regulation and NSSI in BPD, yet no study is available  
4 146 that uses stimuli depicting different stages of NSSI to investigate whether the emotional reaction of  
5 147 BPD patients is gradually dependent on the stage of NSSI shown by the stimuli. A specified stimuli-  
6 148 database, validated in a BPD population for evoking emotional responses in BPD is lacking.  
9

### 10 149 **This Study**

11  
12 150 Although emotion dysregulation is recognized as a core symptom of BPD, current evidence is  
13 151 inconsistent and contradictory. This could be, at least partially, explained by the use of unsuitable  
14 152 and unspecific emotional stimulus material that does not tap into BPD-relevant themes. However, to  
15 153 improve and extend research on emotion regulation in BPD the availability of validated emotional  
16 154 stimuli that reliably elicit emotional reactions distinct for BPD is a necessary prerequisite.

17  
18  
19  
20  
21 155 This study aims to develop and validate an emotional picture set, EPSI (emotional picture set with  
22 156 scenes of self-injury), relevant for BPD. In a second step, the emotional reaction will be assessed by  
23 157 means of a self-report measurement as well as by a psychophysiological assessment of the  
24 158 emotional reaction in a sample of persons with BPD who engage in NSSI, in a depressive control  
25 159 group, and in a sample of matched healthy controls. Furthermore, participants are asked to indicate  
26 160 how strong the pictures relate to their person or biography. EPSI depicts objects frequently used for  
27 161 NSSI and shows the application of these objects at different stages of NSSI (objects only, pre-NSSI,  
28 162 NSSI, during-NSSI). As NSSI can be associated with different emotional reactions depending on the  
29 163 stage of NSSI, differences in the emotional reaction are expected for persons with BPD for the  
30 164 specific NSSI categories. In the pre-NSSI stage (preparing for NSSI), negative affect, arousal, and  
31 165 tension are expected to be strongest. When starting NSSI, negative affect, arousal, and tension  
32 166 might start to decrease. In the during-NSSI stage (successfully performed NSSI, seeing blood), an  
33 167 even stronger decrease of emotions and a sense of relief and relaxation is expected. It is  
34 168 hypothesized that the control groups show the opposite emotional reaction with lowest emotional  
35 169 response when seeing pictures of a pre-NSSI stage and strongest emotional response when  
36 170 watching during-NSSI pictures. Furthermore, BPD participants are expected to report higher self-  
37 171 reference regarding the pictures in comparison to the healthy controls.  
38  
39  
40  
41  
42  
43  
44  
45  
46  
47  
48

49 172 To investigate if our database is BPD relevant, the evaluations of the NSSI images will be compared  
50 173 to neutral images and also to two different control groups. This study allows investigating to what  
51 174 extent EPSI can elicit an emotional response distinctive for persons with BPD and if the emotional  
52 175 response differs with regard to the stage of NSSI.  
53  
54  
55  
56  
57  
58  
59  
60

## 176 Objectives

177 Primary outcome variables are self-rated emotional reaction measured with the Self-Assessment-  
178 Manikin (SAM, <sup>33</sup>); psychophysiological parameters of emotional reaction will be assessed by heart  
179 rate variability (HRV) as indicator of autonomic nervous system (ANS) activity and analyses of facial  
180 expression as measured with Noldus FaceReader software (Noldus Information Technology,  
181 [www.noldus.com](http://www.noldus.com)). As a secondary outcome variable, self-reference of EPSI will be measured on a 5-  
182 point Likert-scale with the item 'How much do you see a relation to your own person/ to your  
183 biography?' from 1 (not at all) to 5 (very much) <sup>18</sup>.

### 184 Primary objectives:

- 185 1. To develop a BPD-relevant stimulus set, an image database of NSSI will be created (EPSI).
- 186 2. To validate EPSI, the emotional reaction to EPSI will be compared to the emotional reaction  
187 to neutral stimuli within groups. Moreover, the emotional reaction to EPSI will be compared  
188 between patients with BPD, depressed patients, and healthy controls.

### 189 Secondary objectives:

- 190 1. To assess the extent, to which the emotional reaction to EPSI in persons with BPD who  
191 engage in NSSI is gradually dependent when seeing pre-NSSI, NSSI, and during NSSI  
192 pictures.
- 193 2. To investigate if persons with BPD who engage in NSSI rate EPSI as more self-referential  
194 than matched healthy controls and depressive controls.
- 195 3. To determine if self-referential measurement correlates positively with the actual emotional  
196 response.
- 197 4. To assess if BPD symptomatology correlates positively with the emotional response.
- 198 5. To investigate if self-rated emotional response does correlate with psychophysiological  
199 measurements of emotional response within and between groups.

## 200 Methods and analysis

### 201 Participants

202 In total 90 participants (30 BPD patients, 30 depressed patients, and 30 healthy control subjects)  
203 aged from 18-60 years will be recruited. To control for altered autonomic response all participants  
204 have to be free of severe, persistent neurological disorders (in particular, epilepsy, multiple  
205 sclerosis, stroke or neurodegenerative disease) and are not allowed to be currently medicated with



1  
2  
3 206 antihistamines, neuroleptic medication, tranquilizers or beta blockers. Further, the BPD patients  
4 207 need to have a lifetime history of self-injury. Exclusion criteria for the BPD patients are psychotic  
5 208 disorders, current major depressive episode, and acute suicidal crisis. The patients in the depressed  
6 209 control group need to suffer from current major depressive episode (depressive symptoms for at  
7 210 least 2 weeks). Depressive patients who also met diagnostic criteria for a psychotic disorder will be  
8 211 excluded. The healthy control group must not exhibit a current psychiatric disorder or history of  
9 212 self-injury. Additional exclusion criteria for both control groups are attempted suicide or current  
10 213 suicide ideation. The control groups will be matched to the BPD group for age and sex.

### 16 17 214 ***Patient and public involvement***

18  
19 215 Patients were not involved in the development of the research question, outcome measures or study  
20 216 design.

### 22 23 217 **Diagnostic procedure**

24  
25 218 Assessments of DSM-IV Personality Disorders (ADP-IV)<sup>34 35</sup> and the Borderline Symptom Checklist  
26 219 (BSL-23)<sup>36</sup> will be used to verify the diagnosis of BPD and to assess BPD symptoms. The structured  
27 220 clinical interview (SCID I,II) will be performed to assess psychiatric disorders<sup>37</sup>.

28  
29  
30  
31 221 To record the history and methods of self-injury, the Inventory of Statements about Self-Injury  
32 222 (ISAS) and the Self-Harm Behavior Questionnaire (SHQ) will be applied<sup>38 39</sup>. Any outcome above  
33 223 zero, that means NSSI has been performed, on the ISAS or SHQ will be an exclusion criterion. The  
34 224 general psychopathology will be recorded with the symptom checklist-90 (SCL-90)<sup>40</sup>. Depressive  
35 225 symptoms will be self-rated with the Beck Depression Inventory (BDI)<sup>41</sup>. Since the study will assess  
36 226 the emotional processing of images, the current mood and stress of the participants could have an  
37 227 influence. Therefore, they will be asked how emotionally strained and charged they are at the  
38 228 moment before and during testing on a Likert-scale ranging from 0-10. To check on the patient, a  
39 229 short break in the middle of the experiment is planned. Acute somatic and psychological  
40 230 dissociation will be assessed by the short version of the Dissociative State Scale (DSS)<sup>42</sup>. Further, a  
41 231 demographic questionnaire, as well as the Edinburgh Handedness Inventory<sup>43</sup> will be applied.

### 42 43 44 45 46 47 48 49 232 **Stimuli**

50  
51 233 Photographs and image processing will be made by a professional photographer. Three categories  
52 234 of objects and scenes for NSSI are planned to be photographed: objects that are frequently used for  
53 235 NSSI by BPD patients (self-injury objects; SIO), scenic presentation of usage shortly before the injury  
54 236 (SIO<sub>bi</sub>), and scenic presentation during the usage of SIO (SIO<sub>dur</sub>). SIOs will be selected based on the

1  
2  
3 237 prevalence of usage decided from psychiatrists' expertise and on the existing literature <sup>44-46</sup>. Actors  
4 238 that are instructed by the experimenters will play the mimicking of the usage of SIOs. Here, only the  
5 239 arms will be visible. Each image that involves body-parts will be acted by a man and a woman to  
6 240 prevent gender bias in the judgment (see Figure 1 for examples from EPSI for the three categories of  
7 241 objects and scenes).

## 242 **Experimental Design**

14 243 Participants will be asked to watch the images and to rate their current emotion on a scale of  
15 244 arousal, dominance, and valence. For this purpose, the Self-Assessment Manikin (SAM) will be used  
16 245 <sup>47</sup>. As control images to the SIO images, neutral objects (e.g., tools) will be shown (see Figure 2 for  
17 246 examples of neutral images). The neutral images will be taken from an existing and validated image  
18 247 database <sup>48</sup>. After half of the stimuli, a break will be done to check for the emotional status of the  
19 248 participants to assess and to prevent dissociations <sup>49</sup>. Image presentation and SAM rating-screens  
20 249 will be pseudorandomized across all categories. In order to prevent decomposition of the patients to  
21 250 the content of the stimuli, the patients will be monitored during the whole session by a therapist to  
22 251 intervene when necessary. In total 90 images will be shown (45 EPSI/ 45 neutral) each shown for  
23 252 500 ms followed by the judgment of the SAM (see Figure 3 for the study design). At the end of the  
24 253 experiment, participants will perform a self-reference rating on all EPSI picture. This will be  
25 254 measured by means of a 5-point scale with anchors: 1="Not at all related to me" s and 5= "Definitely  
26 255 related to me". See table 1 for study timeline flow.

256  
257 *-Please insert Figure 1-*

258  
259  
260 **Figure 1.** *Examples from EPSI for the three categories of objects and scenes for NSSI. From first in a row: objects that are frequently used for*  
261 *NSSI by BPD patients (self-injury objects; SIO), scenic presentation of usage shortly before the injury (SIO<sub>b</sub>), and scenic presentation during*  
262 *the usage of SIO (SIO<sub>dur</sub>).*

263  
264 *-Please insert Figure 2-*

265 **Figure 2.** *Examples of neutral pictures from food-pics: an image database for experimental research on eating and appetite*

## 266 **Physiological Measurement**

### 267 **Autonomic nervous system**

268 Assessment of the heart rate variability (HRV) is a valid and reliable indicator of the autonomic  
269 nervous system (ANS) and is considered as a transdiagnostic marker of psychopathology<sup>50 51</sup>. Heart  
270 rate will be continuously recorded with an EC-12R PC-based resting ECG system (Labtech,  
271 Debrecen, Hungary). Three electrodes will be attached according to Einthoven's triangle plus a  
272 ground at the right lower limb<sup>52</sup>. HRV will be derived through a frequency domain analysis by  
273 taking the time-domain representation of the inter-beat-interval (IBI) and to convert it with a  
274 Fourier transformation to the frequency domain<sup>53</sup>. Since we aim a recording of time at the length of  
275 the experiment, the ECG measurement can be considered as a short-term recording. Hence, the low-  
276 frequency band (LF; 0.04-0.15 Hz) and the high-frequency band (HF; 0.15-0.4 Hz) will be the  
277 frequencies of interest<sup>54</sup>. Processing of the HRV-data will be done with the Kubios HRV software  
278 (www.kubios.com)<sup>55</sup>. A threshold-based artifact correction algorithm, as it is implemented in the  
279 Kubios software will be performed. To separate ectopic and misplaced beats from the normal sinus  
280 rhythm, the automatic artifact correction algorithm will be used<sup>55</sup>. Further, heart rate reactivity will  
281 be calculated.

### 282 **Emotional face activation**

283 The universal emotions happy, sad, angry, surprised, scared, disgusted, and neutral as proposed by  
284 Ekman<sup>56</sup> will be measured with Noldus FaceReader software (Noldus Information Technology,  
285 www.noldus.com). The program detects facial expressions reliably and was successfully applied in  
286 numerous studies<sup>57 58</sup>. Throughout the whole session, the participants will be videotaped with a  
287 webcam. A frame-by-frame analysis will be done by the software. Over 500 key points of the  
288 participant's face are localized and compared to a database of annotated images. The intensity of the  
289 universal emotions is decoded on a scale from 0 to 1, where 0 means that the emotion is not present  
290 and 1 indicates an intensive emotional reaction. In addition to the universal emotions, the software  
291 also captures valence and arousal. Valence is calculated as the intensity of 'happy' minus the  
292 intensity of the negative expressions (angry, scared, and disgusted) with the highest intensity. For  
293 arousal, the mean activation over the last 60 seconds of certain muscle groups in the face is  
294 subtracted from the current muscle activation. The mean of the five highest values results in a value  
295 of arousal.

296 To prevent a bias towards certain expressions a calibration will be done with a neutral look for each  
297 participant.

1  
2  
3 2984  
5 299*-Please insert Figure3-*6  
7 3008  
9 301

10  
11  
12 **Figure 3.** A) *Study design.* B) *Experimental paradigm;* NSSI=non-suicidal self-injury; SAM I/II/III=Self-Assessment Manikin  
13 302 (Dominance, Arousal, and Valence) presented pseudorandomized

14  
15 303 **Statistical analysis**

16  
17  
18 304 **Stimulus Validation**

19  
20 305 Interrater reliability will be assessed with Krippendorff's alpha. The advantage over other statistical  
21 306 methods to assess interrater reliability is that Krippendorff's alpha allows more than two raters  
22 307 (unlike Cohen's Kappa) and also can handle missing data points (unlike Fleiss Kappa)<sup>59</sup>. The  
23 308 assumption of Krippendorff's alpha is based on the observed disagreement corrected for  
24 309 disagreement by chance, which is calculable to a range of -1 to 1, where 1 illustrates perfect  
25 310 agreement, 0 means no agreement beyond chance, and negative values indicate inverse agreement  
26 311<sup>59 60</sup>. Bootstrapped confidence intervals will be used since the distribution is not known, the  
27 312 derivation of the correct standard error is not straightforward, and the type 1 error level is  
28 313 acceptable<sup>59 61 62</sup>. Krippendorff's alpha will be computed for each SAM-dimension for each stimuli  
29 314 category.

30  
31  
32  
33  
34  
35 315 **Behavioral Data**

36  
37  
38 316 If the data show normal distribution, a 2x3x4 between-subjects analysis of variance (ANOVA) will  
39 317 be computed with the factors group, SAM-evaluation, and stimulus category. Further, the  
40 318 questionnaire scores will be correlated with the SAM-evaluations for each stimulus category. To  
41 319 assess gender bias, a linear regression will be performed to rule out possible performance  
42 320 differences.

43  
44  
45  
46  
47  
48  
49 321  
50  
51 322 **Physiological Data**

52  
53  
54 323 **HRV**

324 Group-wise comparisons of HRV will be computed with a 2x2x4 ANOVA with the factors group,  
 325 frequencies, and stimulus category.

326

327 ***Emotional Face Activation***

328 Facial expressions will be evaluated group-wise for each of the six universal emotions and stimulus  
 329 categories, which results in a 2x4x6 ANOVA under the assumption of normally distributed data.  
 330 Besides t-testing the group difference in valence and arousal, a correlation will be calculated with  
 331 the SAM dimensions of valence and arousal. This serves as a further measure of the reliability of the  
 332 participants' behavioral response with their physiological reaction to the stimuli.

### 333 **Sample size justification**

334 Based on calculations with G\*Power, a fixed effects ANOVA with 30 participants per group will yield  
 335 a large effect size (0.62) with a power of 0.66.<sup>63</sup>. The size of the groups was derived from earlier  
 336 studies comparing the affective reaction of BPD patients with healthy controls while watching  
 337 images <sup>64</sup><sup>65</sup>.

338 **Table 1** Study timeline flow

| Months                            | 1 <sup>st</sup> year |   |   | 2 <sup>st</sup> year |    |    |    | 3 <sup>rd</sup> year |    |    |    |    |
|-----------------------------------|----------------------|---|---|----------------------|----|----|----|----------------------|----|----|----|----|
|                                   | 1                    | 4 | 7 | 10                   | 13 | 16 | 19 | 22                   | 25 | 28 | 31 | 34 |
| <b>Study preparation</b>          | X                    | X |   |                      |    |    |    |                      |    |    |    |    |
| <b>Recruitment</b>                | X                    | X | X |                      |    |    |    |                      |    |    |    |    |
| <b>Clinical conduct</b>           |                      |   | X |                      | X  | X  |    |                      |    |    |    |    |
| <b>Database clearing</b>          |                      |   |   |                      | X  | X  |    |                      |    |    |    |    |
| <b>Data analysis, publication</b> |                      |   |   |                      | X  | X  | X  | X                    | X  | X  | X  | X  |

339

340

341

342

## 343 **Ethics and dissemination**

344 The study will be conducted in accordance with the declaration of Helsinki in order to ensure the  
345 well-being and rights of the participants. The project has received ethical approval by the local  
346 medical ethics committee of the Carl-von-Ossietzky University of Oldenburg (registration: 2017-  
347 044). Written informed consent will be obtained from all participants. Participants will be able to  
348 withdraw from the study at any time without giving any reasons. During all measurement, medical  
349 professionals will be present. The study is registered at ClinicalTrials (URL) with the trial  
350 registration number: NCT03149926. Results of the main trial and each of the secondary endpoints  
351 will be submitted for publication in a peer-reviewed journal.

352

353 We used the SPIRIT checklist when writing our report <sup>66</sup>

354 **Reference**

- 355 1. APA. Diagnostic and Statistical Manual of Mental Disorders, 5th edn.  
356 Washington DC: Amer Psychiatric Association 2013.
- 357 2. Lieb K, Zanarini MC, Schmahl C, et al. Borderline personality disorder.  
358 *Lancet (London, England)* 2004;364(9432):453-61. doi: 10.1016/s0140-  
359 6736(04)16770-6 [published Online First: 2004/08/04]
- 360 3. Linehan M. Cognitive-behavioral Treatment of Borderline Personality  
361 Disorder: Guilford Publications 1993.
- 362 4. Svaldi J, Dorn C, Matthies S, et al. Effects of suppression and acceptance of  
363 sadness on the urge for non-suicidal self-injury and self-punishment.  
364 *Psychiatry research* 2012;200(2-3):404-16. doi:  
365 10.1016/j.psychres.2012.06.030 [published Online First: 2012/07/24]
- 366 5. Eddie D, Bates ME, Vaschillo EG, et al. Rest, Reactivity, and Recovery: A  
367 Psychophysiological Assessment of Borderline Personality Disorder.  
368 *Front Psychiatry* 2018;9:505. doi: 10.3389/fpsy.2018.00505 [published  
369 Online First: 2018/11/06]
- 370 6. Baskin-Sommers AR, Hooley JM, Dahlgren MK, et al. Elevated Preattentive  
371 Affective Processing in Individuals with Borderline Personality Disorder:  
372 A Preliminary fMRI Study. *Front Psychol* 2015;6:1866. doi:  
373 10.3389/fpsyg.2015.01866 [published Online First: 2015/12/24]
- 374 7. Cullen KR, LaRiviere LL, Vizueta N, et al. Brain activation in response to  
375 overt and covert fear and happy faces in women with borderline  
376 personality disorder. *Brain imaging and behavior* 2016;10(2):319-31.  
377 doi: 10.1007/s11682-015-9406-4 [published Online First: 2015/05/27]
- 378 8. Hazlett EA, Zhang J, New AS, et al. Potentiated amygdala response to  
379 repeated emotional pictures in borderline personality disorder. *Biol*  
380 *Psychiatry* 2012;72(6):448-56. doi: 10.1016/j.biopsych.2012.03.027  
381 [published Online First: 2012/05/09]
- 382 9. Suvak MK, Sege CT, Sloan DM, et al. Emotional Processing in Borderline  
383 Personality Disorder. *Personality disorders* 2012;3(3):273-82. doi:  
384 10.1037/a0027331
- 385 10. Lobbetael J, Arntz A. Emotional hyperreactivity in response to childhood  
386 abuse by primary caregivers in patients with borderline personality  
387 disorder. *Journal of behavior therapy and experimental psychiatry*  
388 2015;48:125-32. doi: 10.1016/j.jbtep.2015.03.005 [published Online  
389 First: 2015/04/05]
- 390 11. Koenigsberg HW, Fan J, Ochsner KN, et al. Neural correlates of the use of  
391 psychological distancing to regulate responses to negative social cues: a  
392 study of patients with borderline personality disorder. *Biol Psychiatry*

- 1  
2  
3 393 2009;66(9):854-63. doi: 10.1016/j.biopsycho.2009.06.010 [published  
4 394 Online First: 2009/08/05]
- 5  
6 395 12. Kraus A, Valerius G, Seifritz E, et al. Script-driven imagery of self-injurious  
7 396 behavior in patients with borderline personality disorder: a pilot fMRI  
8 397 study. *Acta Psychiatr Scand* 2010;121(1):41-51. doi: 10.1111/j.1600-  
9 398 0447.2009.01417.x
- 10  
11 399 13. Sloan DM, Sege CT, McSweeney LB, et al. Development of a borderline  
12 400 personality disorder-relevant picture stimulus set. *Journal of personality*  
13 401 *disorders* 2010;24(5):664-75. doi: 10.1521/pedi.2010.24.5.664  
14 402 [published Online First: 2010/10/21]
- 15  
16  
17 403 14. van Zutphen L, Siep N, Jacob GA, et al. Emotional sensitivity, emotion  
18 404 regulation and impulsivity in borderline personality disorder: a critical  
19 405 review of fMRI studies. *Neuroscience and biobehavioral reviews*  
20 406 2015;51:64-76. doi: 10.1016/j.neubiorev.2015.01.001 [published Online  
21 407 First: 2015/01/24]
- 22  
23  
24 408 15. Feliu-Soler A, Pascual JC, Soler J, et al. Emotional responses to a negative  
25 409 emotion induction procedure in Borderline Personality Disorder.  
26 410 *International Journal of Clinical and Health Psychology* 2013;13(1):9-17.  
27 411 doi: [https://doi.org/10.1016/S1697-2600\(13\)70002-4](https://doi.org/10.1016/S1697-2600(13)70002-4)
- 28  
29 412 16. Kuo JR, Linehan MM. Disentangling emotion processes in borderline  
30 413 personality disorder: physiological and self-reported assessment of  
31 414 biological vulnerability, baseline intensity, and reactivity to emotionally  
32 415 evocative stimuli. *Journal of abnormal psychology* 2009;118(3):531-44.  
33 416 doi: 10.1037/a0016392 [published Online First: 2009/08/19]
- 34  
35  
36 417 17. Eddie D, Bates ME. Toward validation of a borderline personality disorder-  
37 418 relevant picture set. *Personal Disord* 2017;8(3):255-60. doi:  
38 419 10.1037/per0000173 [published Online First: 2016/04/06]
- 39  
40 420 18. Sauer C, Arens EA, Stopsack M, et al. Emotional hyper-reactivity in  
41 421 borderline personality disorder is related to trauma and interpersonal  
42 422 themes. *Psychiatry research* 2014;220(1-2):468-76. doi:  
43 423 10.1016/j.psychres.2014.06.041 [published Online First: 2014/07/30]
- 44  
45  
46 424 19. Kučera D, Haviger J. Using Mood Induction Procedures in Psychological  
47 425 Research. *Procedia - Social and Behavioral Sciences* 2012;69(Supplement  
48 426 C):31-40. doi: <https://doi.org/10.1016/j.sbspro.2012.11.380>
- 49  
50 427 20. Philippot P, Schaefer A, Herbette G. Consequences of specific processing of  
51 428 emotional information: Impact of general versus specific  
52 429 autobiographical memory priming on emotion elicitation. *Emotion*  
53 430 (*Washington, DC*) 2003;3(3):270-83. doi: 10.1037/1528-3542.3.3.270  
54 431 [published Online First: 2003/09/23]
- 55  
56  
57  
58  
59  
60



- 1  
2  
3 432 21. Zetterqvist M. The DSM-5 diagnosis of nonsuicidal self-injury disorder: a  
4 433 review of the empirical literature. *Child and adolescent psychiatry and*  
5 434 *mental health* 2015;9:31. doi: 10.1186/s13034-015-0062-7 [published  
6 435 Online First: 2015/09/30]
- 7  
8 436 22. Association AP. Diagnostic and Statistical Manual of Mental Disorders:  
9 437 Dsm-5: Amer Psychiatric Pub Incorporated 2013.
- 10 438 23. Zanarini MC, Frankenburg FR, Reich DB, et al. The 10-year course of  
11 439 physically self-destructive acts reported by borderline patients and axis  
12 440 II comparison subjects. *Acta psychiatrica Scandinavica* 2008;117(3):177-  
13 441 84. doi: 10.1111/j.1600-0447.2008.01155.x [published Online First:  
14 442 2008/02/05]
- 15 443 24. Favazza AR. The coming of age of self-mutilation. *J Nerv Ment Dis*  
16 444 1998;186(5):259-68. [published Online First: 1998/06/05]
- 17 445 25. Reitz S, Kluetsch R, Niedtfeld I, et al. Incision and stress regulation in  
18 446 borderline personality disorder: neurobiological mechanisms of self-  
19 447 injurious behaviour. *The British journal of psychiatry : the journal of*  
20 448 *mental science* 2015;207(2):165-72. doi: 10.1192/bjp.bp.114.153379  
21 449 [published Online First: 2015/04/25]
- 22 450 26. Chapman AL, Gratz KL, Brown MZ. Solving the puzzle of deliberate self-  
23 451 harm: the experiential avoidance model. *Behaviour research and therapy*  
24 452 2006;44(3):371-94. doi: 10.1016/j.brat.2005.03.005 [published Online  
25 453 First: 2006/02/01]
- 26 454 27. Nock MK, Prinstein MJ. A functional approach to the assessment of self-  
27 455 mutilative behavior. *Journal of consulting and clinical psychology*  
28 456 2004;72(5):885-90. doi: 10.1037/0022-006x.72.5.885 [published Online  
29 457 First: 2004/10/16]
- 30 458 28. Andover MS, Morris BW. Expanding and clarifying the role of emotion  
31 459 regulation in nonsuicidal self-injury. *Canadian journal of psychiatry*  
32 460 *Revue canadienne de psychiatrie* 2014;59(11):569-75. doi:  
33 461 10.1177/070674371405901102 [published Online First: 2015/01/08]
- 34 462 29. Klonsky ED. The functions of deliberate self-injury: a review of the  
35 463 evidence. *Clinical psychology review* 2007;27(2):226-39. doi:  
36 464 10.1016/j.cpr.2006.08.002 [published Online First: 2006/10/04]
- 37 465 30. Victor SE, Klonsky ED. Daily emotion in non-suicidal self-injury. *J Clin*  
38 466 *Psychol* 2014;70(4):364-75. doi: 10.1002/jclp.22037 [published Online  
39 467 First: 2013/09/05]
- 40 468 31. Glenn CR, Klonsky ED. The role of seeing blood in non-suicidal self-injury. *J*  
41 469 *Clin Psychol* 2010;66(4):466-73. doi: 10.1002/jclp.20661 [published  
42 470 Online First: 2010/02/09]

- 1  
2  
3 471 32. Naoum J, Reitz S, Krause-Utz A, et al. The role of seeing blood in non-  
4 472 suicidal self-injury in female patients with borderline personality  
5 473 disorder. *Psychiatry research* 2016;246:676-82. doi:  
6 474 10.1016/j.psychres.2016.10.066 [published Online First: 2016/11/11]  
7  
8 475 33. Bradley MM, Lang PJ. Measuring emotion: the Self-Assessment Manikin and  
9 476 the Semantic Differential. *Journal of behavior therapy and experimental*  
10 477 *psychiatry* 1994;25(1):49-59. [published Online First: 1994/03/01]  
11  
12 478 34. Schotte C, De Doncker D. ADP-IV Questionnaire. *University Hospital*  
13 479 *Antwerp, Antwerp* 1994  
14  
15 480 35. Doering S, Renn D, Höfer S, et al. Validierung der deutschen Version des  
16 481 Fragebogens zur Erfassung von DSM-IV Persönlichkeitsstörungen (ADP-  
17 482 IV). *Zeitschrift für Psychosomatische Medizin und Psychotherapie*  
18 483 2007;53(2):111-28.  
19  
20 484 36. Wolf M, Limberger M, Kleindienst N, et al. Kurzversion der Borderline-  
21 485 Symptom-Liste (BSL-23): Entwicklung und Überprüfung der  
22 486 psychometrischen Eigenschaften. *Psychiatrie, Psychosomatik und*  
23 487 *Medizinische Psychologie. Psychother Psychosom Med Psychol*  
24 488 2009;59:321-24.  
25  
26 489 37. Wittchen H-U, Wunderlich U, Gruschwitz S, et al. SKID I. Strukturiertes  
27 490 Klinisches Interview für DSM-IV. Achse I: Psychische Störungen.  
28 491 Interviewheft und Beurteilungsheft. Eine deutschsprachige, erweiterte  
29 492 Bearb. d. amerikanischen Originalversion des SKID I. 1997  
30  
31 493 38. Klonsky ED, Glenn CR. Assessing the functions of non-suicidal self-injury:  
32 494 Psychometric properties of the Inventory of Statements About Self-  
33 495 injury (ISAS). *Journal of Psychopathology and Behavioral Assessment*  
34 496 2009;31(3):215-19.  
35  
36 497 39. Gutierrez PM, Osman A, Barrios FX, et al. Development and initial  
37 498 validation of the Self-Harm Behavior Questionnaire. *Journal of*  
38 499 *Personality Assessment* 2001;77(3):475-90.  
39  
40 500 40. Franke GH. Symptom-Checkliste von Derogatis (SCL-90-R): Beltz Test  
41 501 2002.  
42  
43 502 41. Beck AT, Steer RA, Brown GK. BDI-II, Beck Depression Inventory: Manual:  
44 503 Psychological Corporation 1996.  
45  
46 504 42. Stiglmayr CE, Braakmann D, Haaf B, et al. Entwicklung und  
47 505 psychometrische Charakteristika der Dissoziations-Spannungs-Skala  
48 506 akut (DSS-akut). *PPmP-Psychotherapie· Psychosomatik· Medizinische*  
49 507 *Psychologie* 2003;53(07):287-94.  
50  
51 508 43. Oldfield RC. The assessment and analysis of handedness: the Edinburgh  
52 509 inventory. *Neuropsychologia* 1971;9(1):97-113.  
53  
54  
55  
56  
57  
58  
59  
60

- 1  
2  
3 510 44. Svaldi J, Dorn C, Matthies S, et al. Effects of suppression and acceptance of  
4 511 sadness on the urge for non-suicidal self-injury and self-punishment.  
5 512 *Psychiatry research* 2012;200(2):404-16.  
6  
7 513 45. Brown R, Fischer T, Goldwisch A, et al. # cutting: Non-suicidal self-injury  
8 514 (NSSI) on Instagram. *Psychological medicine* 2018;48(2):337-46.  
9  
10 515 46. Klonsky ED. The functions of deliberate self-injury: A review of the  
11 516 evidence. *Clinical psychology review* 2007;27(2):226-39.  
12  
13 517 47. Bradley MM, Lang PJ. Measuring emotion: the self-assessment manikin and  
14 518 the semantic differential. *Journal of behavior therapy and experimental*  
15 519 *psychiatry* 1994;25(1):49-59.  
16  
17 520 48. Blechert J, Meule A, Busch NA, et al. Food-pics: an image database for  
18 521 experimental research on eating and appetite. *Front Psychol* 2014;5:617.  
19 522 doi: 10.3389/fpsyg.2014.00617  
20  
21 523 49. Jaeger S, Steinert T, Uhlmann C, et al. Dissociation in patients with  
22 524 borderline personality disorder in acute inpatient care—A latent profile  
23 525 analysis. *Comprehensive Psychiatry* 2017;78:67-75.  
24  
25 526 50. Koenig J, Rinnewitz L, Parzer P, et al. Resting cardiac function in adolescent  
26 527 non-suicidal self-injury: the impact of borderline personality disorder  
27 528 symptoms and psychosocial functioning. *Psychiatry research*  
28 529 2017;248:117-20.  
29  
30 530 51. Wilson ST, Chesin M, Fertuck E, et al. Heart rate variability and suicidal  
31 531 behavior. *Psychiatry research* 2016;240:241-47.  
32  
33 532 52. Einthoven W, Fahr G, De Waart A. Über die Richtung und die manifeste  
34 533 Grösse der Potentialschwankungen im menschlichen Herzen und über  
35 534 den Einfluss der Herzlage auf die Form des Elektrokardiogramms.  
36 535 *Pflügers Archiv European Journal of Physiology* 1913;150(6):275-315.  
37  
38 536 53. Allen JJ, Chambers AS, Towers DN. The many metrics of cardiac  
39 537 chronotropy: A pragmatic primer and a brief comparison of metrics.  
40 538 *Biological psychology* 2007;74(2):243-62.  
41  
42 539 54. Thayer JF, Hansen AL, Johnsen BH. The non-invasive assessment of  
43 540 autonomic influences on the heart using impedance cardiography and  
44 541 heart rate variability. *Handbook of behavioral medicine*: Springer  
45 542 2010:723-40.  
46  
47 543 55. Tarvainen MP, Niskanen J-P, Lipponen JA, et al. Kubios HRV—heart rate  
48 544 variability analysis software. *Computer methods and programs in*  
49 545 *biomedicine* 2014;113(1):210-20.  
50  
51 546 56. Ekman P, Keltner D. Universal facial expressions of emotion. *California*  
52 547 *mental health research digest* 1970;8(4):151-58.  
53  
54  
55  
56  
57  
58  
59  
60

- 1  
2  
3 548 57. Boerner KE, Chambers CT, McGrath PJ, et al. The Effect of Parental  
4 549 Modeling on Child Pain Responses: The Role of Parent and Child Sex. *The*  
5 550 *Journal of Pain* 2017;18(6):702-15.  
6 551  
7 551 58. Dalton PS, Jimenez VH, Noussair CN. Exposure to poverty and  
8 552 productivity. *PloS one* 2017;12(1):e0170231.  
9 553  
10 553 59. Zapf A, Castell S, Morawietz L, et al. Measuring inter-rater reliability for  
11 554 nominal data—which coefficients and confidence intervals are  
12 555 appropriate? *BMC medical research methodology* 2016;16(1):93.  
13 556  
14 556 60. Krippendorff K. Estimating the reliability, systematic error and random  
15 557 error of interval data. *Educational and Psychological Measurement*  
16 558 1970;30(1):61-70.  
17 559  
18 559 61. Vanbelle S, Albert A. A bootstrap method for comparing correlated kappa  
19 560 coefficients. *Journal of Statistical Computation and Simulation*  
20 561 2008;78(11):1009-15.  
21 562  
22 562 62. McKenzie DP, Mackinnon AJ, Péladeau N, et al. Comparing correlated  
23 563 kappas by resampling: Is one level of agreement significantly different  
24 564 from another? *Journal of psychiatric research* 1996;30(6):483-92.  
25 565  
26 565 63. Faul F, Erdfelder E, Lang A-G, et al. G\* Power 3: A flexible statistical power  
27 566 analysis program for the social, behavioral, and biomedical sciences.  
28 567 *Behavior research methods* 2007;39(2):175-91.  
29 568  
30 568 64. Sauer C, Arens EA, Stopsack M, et al. Emotional hyper-reactivity in  
31 569 borderline personality disorder is related to trauma and interpersonal  
32 570 themes. *Psychiatry research* 2014;220(1):468-76.  
33 571  
34 571 65. Eddie D, Bates ME. Toward validation of a borderline personality disorder–  
35 572 relevant picture set. *Personality Disorders: Theory, Research, and*  
36 573 *Treatment* 2017;8(3):255.  
37 574  
38 574 66. Chan AW, Tetzlaff JM, Gotzsche PC, et al. SPIRIT 2013 explanation and  
39 575 elaboration: guidance for protocols of clinical trials. *BMJ (Clinical*  
40 576 *research ed)* 2013;346:e7586. doi: 10.1136/bmj.e7586 [published  
41 577 Online First: 2013/01/11]  
42  
43  
44  
45 578  
46  
47 579  
48  
49  
50  
51  
52  
53  
54  
55  
56  
57  
58  
59  
60

1  
2  
3 **580 Authors' contributions**  
4

5 581 KB, MS: study design, literature search, figures, writing  
6

7 582 PS: study design, literature search, writing, supervision  
8  
9

10 583 CS: study design, supervision  
11

12 584 AP: study design, literature search, writing, supervision  
13  
14  
15

16 **585 Funding statement**  
17

18 586 This research received no specific grant from any funding agency in the public, commercial or not-  
19 for-profit sectors.  
20 587  
21  
22

23 **588 Competing interests statement**  
24

25 589 KB, MS, PS, CS declare that the research was conducted in the absence of any commercial or  
26 financial relationships that could be construed as a potential conflict of interest.  
27 590  
28

29 591 AP declares that she served on advisory boards, gave lectures, performed phase 3 studies, or  
30 received travel grants within the last 3 years from Eli Lilly and Co, Lundbeck, MEDICE Arzneimittel,  
31 Pütter GmbH and Co KG, Novartis, Servier, and Shire; and has authored books and articles on ADHD  
32 published by Elsevier, Hogrefe, Schattauer, Kohlhammer, Karger, and Springer.  
33 593  
34 594  
35  
36

37 595  
38

39 596  
40

41  
42 597 We used the SPIRIT checklist when writing our report <sup>66</sup>  
43  
44  
45  
46  
47  
48  
49  
50  
51  
52  
53  
54  
55  
56  
57  
58  
59  
60

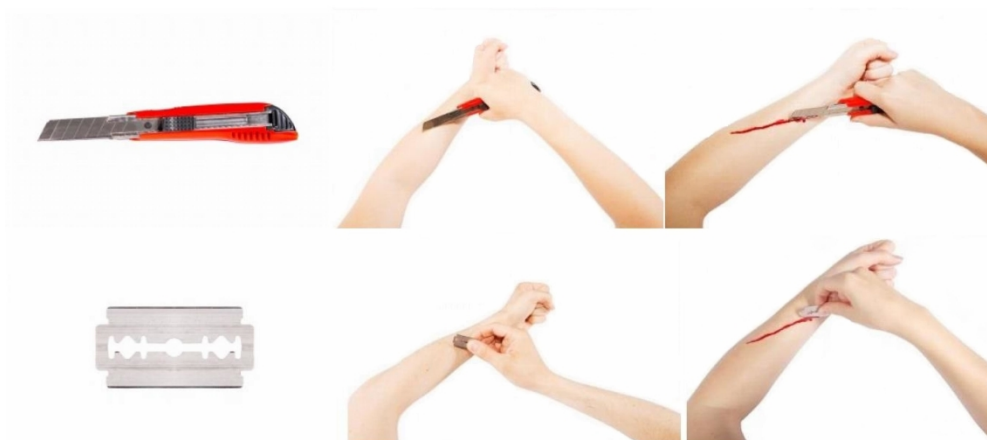

Figure 1. Examples from EPSI for the three categories of objects and scenes for NSSI. From first in a row: objects that are frequently used for NSSI by BPD patients (self-injury objects; SIO), scenic presentation of usage shortly before the injury (SIObi), and scenic presentation during the usage of SIO (SIOdur).

312x154mm (300 x 300 DPI)

1  
2  
3  
4  
5  
6  
7  
8  
9  
10  
11  
12  
13  
14  
15  
16  
17  
18  
19  
20  
21  
22  
23  
24  
25  
26  
27  
28  
29  
30  
31  
32  
33  
34  
35  
36  
37  
38  
39  
40  
41  
42  
43  
44  
45  
46  
47  
48  
49  
50  
51  
52  
53  
54  
55  
56  
57  
58  
59  
60

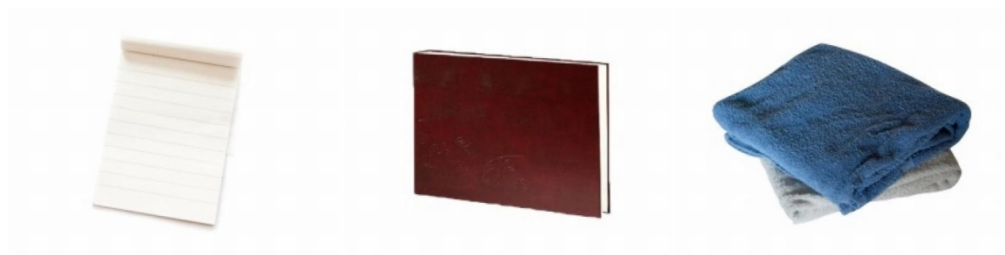

Figure 2. Examples of neutral pictures from food-pics: an image database for experimental research on eating and appetite

311x93mm (300 x 300 DPI)

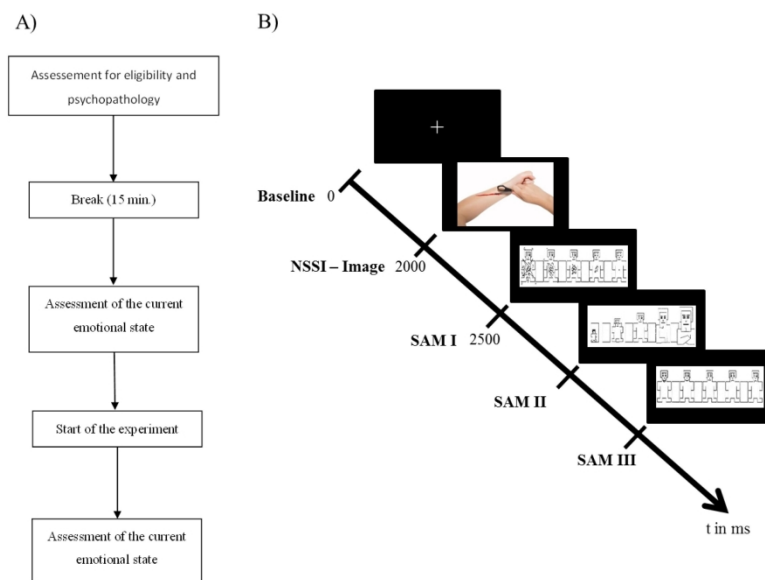

Figure 3. A) Study design. B) Experimental paradigm; NSSI=non-suicidal self-injury; SAM I/II/III=Self-Assessment Manikin (Dominance, Arousal, and Valence) presented pseudorandomized

311x196mm (300 x 300 DPI)



# BMJ Open

## Development and validation of an emotional picture set of self-injury (EPSI) for borderline personality disorder: protocol for a validation study

|                                 |                                                                                                                                                                                                                                                                                                                                                                                                                                                                   |
|---------------------------------|-------------------------------------------------------------------------------------------------------------------------------------------------------------------------------------------------------------------------------------------------------------------------------------------------------------------------------------------------------------------------------------------------------------------------------------------------------------------|
| Journal:                        | <i>BMJ Open</i>                                                                                                                                                                                                                                                                                                                                                                                                                                                   |
| Manuscript ID                   | bmjopen-2018-027063.R2                                                                                                                                                                                                                                                                                                                                                                                                                                            |
| Article Type:                   | Protocol                                                                                                                                                                                                                                                                                                                                                                                                                                                          |
| Date Submitted by the Author:   | 01-Apr-2019                                                                                                                                                                                                                                                                                                                                                                                                                                                       |
| Complete List of Authors:       | Bachmann, Katharina; Carl von Ossietzky Universitat Oldenburg, Schulze, Marcel; Rheinische Friedrich-Wilhelms-Universitat Bonn Sörös, Peter; University of Oldenburg Schmahl, Christian; Central Institute of Mental Health, Medical Faculty Mannheim, Heidelberg University Philipsen, Alexandra; Rheinische Friedrich-Wilhelms-Universitat Bonn, Department of Psychiatry and Psychotherapy; University of Freiburg, Faculty of Medicine University of Freiburg |
| <b>Primary Subject Heading</b>: | Medical publishing and peer review                                                                                                                                                                                                                                                                                                                                                                                                                                |
| Secondary Subject Heading:      | Mental health                                                                                                                                                                                                                                                                                                                                                                                                                                                     |
| Keywords:                       | Borderline, Emotion regulation, Emotional stimuli, NSSI                                                                                                                                                                                                                                                                                                                                                                                                           |
|                                 |                                                                                                                                                                                                                                                                                                                                                                                                                                                                   |

SCHOLARONE™  
Manuscripts

# 1 Development and validation of an 2 emotional picture set of self-injury 3 (EPSI) for borderline personality 4 disorder: protocol for a validation study

---

5 Katharina Bachmann<sup>1\*</sup>, Marcel Schulze<sup>2\*</sup>, Peter Sörös<sup>3,4</sup>, Christian Schmahl<sup>5</sup>, Alexandra Philipsen<sup>2,6</sup>

6 <sup>1</sup> Medical Campus University of Oldenburg, School of Medicine and Health Sciences, Psychiatry and  
7 Psychotherapy – University Hospital, Karl-Jaspers-Klinik, Bad Zwischenahn, Germany

8 <sup>2</sup> Department of Psychiatry and Psychotherapy, University of Bonn, Bonn, Germany

9 <sup>3</sup>Neurology, School of Medicine and Health Sciences, University of Oldenburg, Oldenburg, Germany

10 <sup>4</sup> Research Center Neurosensory Science, University of Oldenburg, Oldenburg, Germany

11 <sup>5</sup>Department of Psychosomatic Medicine and Psychotherapy, Central Institute of Mental Health,  
12 Medical Faculty Mannheim, Heidelberg University

13 <sup>6</sup>Department of Psychiatry and Psychotherapy Medical Center – University of Freiburg, Faculty of  
14 Medicine University of Freiburg, Germany

15 \* Both authors contributed equally

**Word count**

Abstract: 186

Text: 3333

References: 66

Tables &amp; figures: 4

Issue date: April 2019

Original

Authors: KB, MS, PS, CS, AP

For peer review only

Corresponding author:

Katharina Bachmann, M.Sc.

Medical Campus University of Oldenburg, School of Medicine and Health Sciences, Psychiatry and  
Psychotherapy – University Hospital, Karl-Jaspers-Klinik, Bad Zwischenahn, Germany

Postal address: Hermann-Ehlers-Straße 7, 26160 Bad Zwischenahn, Germany.

Tel.: 0049-441-9615-1501

Fax: 0049-441-9615-1599

Email: Katharina.Bachmann@uni-oldenburg.de

## 48 **Abstract**

49 **Introduction:** Borderline personality disorder (BPD) is a severe psychiatric disorder that is  
50 characterized by major problems in emotion regulation. Affected persons frequently engage in non-  
51 suicidal self-injury (NSSI) to regulate emotions. NSSI is associated with high emotionality in BPD  
52 patients and it can be expected that stimuli depicting scenes of NSSI elicit an emotional response  
53 indicative of BPD. The present study protocol describes the development and validation of an  
54 emotional picture set of self-injury (EPSI) to advance future research on emotion regulation in BPD.

55 **Methods and analysis:** The present validation study aims to develop and validate an emotional  
56 picture set relevant for BPD. Emotional responses to EPSI as well as to a neutral picture set will be  
57 investigated in a sample of 30 BPD patients compared to 30 matched, healthy controls and to 30  
58 matched depressive controls. Emotional responses will be assessed by heart rate variability (HRV),  
59 facial expression and Self-Assessment Manikin (SAM).

60 **Ethics and dissemination:** Ethics approval was obtained by the medical ethics committee of the  
61 Carl-von-Ossietzky University of Oldenburg, Germany (registration: 2017-044). Results of the trial  
62 will be submitted for publication in a peer-reviewed journal.

63 **Trial registration number:** clinicaltrials.gov: NCT03149926

64 **Keywords:** Borderline, Emotion regulation, Emotional stimuli, NSSI

65

66

67

68

69

70

71

72

73

1  
2  
3 74 **Strengths and limitations of this study**  
4

- 5 75 • Controlled study design to develop emotional stimuli relevant for BPD  
6  
7 76 • Emotional reaction is assessed by subjective as well as objective measurements  
8  
9 77 • Emotion evocation is limited to NSSI however other emotional trigger (e.g. social  
10 78 interaction) are not investigated  
11  
12 79 • Limited to BPD patients that actually engage in NSSI  
13  
14  
15 80

16  
17  
18  
19  
20  
21  
22  
23  
24  
25  
26  
27  
28  
29  
30  
31  
32  
33  
34  
35  
36  
37  
38  
39  
40  
41  
42  
43  
44  
45  
46  
47  
48  
49  
50  
51  
52  
53  
54  
55  
56  
57  
58  
59  
60

For peer review only

## 81 Introduction

82 Borderline personality disorder (BPD) is a severe psychiatric disorder that is characterized by  
83 impairments in interpersonal, cognitive and emotional functioning<sup>1,2</sup>. Pervasive problems of affect  
84 regulation have been identified as the central dysfunction in BPD and it has been conceptualized as  
85 a disorder of the emotion regulation system<sup>3</sup>. Emotion dysregulation comprises high emotional  
86 vulnerability in conjunction with an inability to regulate emotions. Emotional vulnerability in  
87 individuals with BPD is characterized by high sensitivity to emotional stimuli, unusual emotional  
88 intensity and a slow return to emotional baseline (emotions are long-lasting). In addition, the  
89 identification, expression and inhibition of emotions are impaired<sup>3-5</sup>.

90 Not surprisingly, emotionally evocative material is commonly used to investigate BPD pathology.  
91 Previous studies have employed various emotional stimuli such as emotional facial expression<sup>6,7</sup>,  
92 pleasant or unpleasant pictures<sup>8,9</sup>, pictures and video clips depicting social interactions<sup>10,11</sup>, or  
93 script-driven imagery of a self-injurious act<sup>12</sup>. However, extant research utilizing such emotionally  
94 evocative materials are inconsistent in their ability to provoke emotional responses in BPD patients  
95<sup>13,14</sup>. While some studies did not find evidence for abnormal emotional responsiveness in BPD<sup>9,15,16</sup>  
96 others did<sup>12,17,18</sup>. One possible explanation for these contradictory results might be that the stimulus  
97 material was not specific enough to elicit an emotional response in participants with BPD. For  
98 example, a recent study investigated differences in emotional response and specificity of the  
99 presented stimuli, as well as baseline emotional intensity and emotional reactivity in BPD patients,  
100 compared to healthy controls. Emotional response to six discrete emotion-eliciting film clips was  
101 evaluated by measuring physiological and subjective reactions. Furthermore, the two groups were  
102 compared regarding their emotional reaction to films with BPD-specific content (e.g. sexual abuse,  
103 emotional dependence and abandonment/separation). Compared to healthy controls, participants  
104 with BPD showed a significantly stronger emotional response to 'BPD-specific content' films<sup>18</sup>,  
105 compared to films with non-BPD-specific emotional content. These findings suggest that measuring  
106 emotional responses characteristic of BPD only make sense in contexts that are psychologically  
107 challenging<sup>9,13</sup>. The actual emergence and intensity of emotions depend on an array of psychological  
108 characteristics such as personality, learning experiences and cognition, the situational context, but  
109 also on the type and intensity of the perceived stimulus<sup>19</sup>. Emotional stimuli that activate specific,  
110 self-relevant information seem to arouse a more intense emotional reaction than more general  
111 emotional stimuli<sup>5,20</sup>. Therefore, to elicit a distinctive and BPD-specific emotional response, the  
112 stimulus material needs to have a high relevance for persons with BPD and needs to trigger

1  
2  
3 113 sensitivities that relate to BPD<sup>5-9</sup>. Such a BPD specific event could include the presentation of  
4 114 material used for non-suicidal self-injury (NSSI).

6  
7 115 NSSI is associated with clinical and functional impairments and occurs in a variety of psychiatric  
8 116 disorders<sup>21</sup>. There is an ongoing scientific debate regarding the conceptualization and diagnostic  
9 117 organization of NSSI. The fifth version of the Diagnostic and Statistical Manual of Mental Disorders  
10 118 (DSM-5) presents Non-Suicidal Self-Injury Disorder (NSSID) as a separate nosological entity, but  
11 119 only as a condition that still requires further investigation<sup>21-22</sup>. Thus, NSSI is not unique to BPD.  
12 120 Nevertheless, there is a general consensus that NSSI is related to BPD and is considered to be a core  
13 121 symptom of the disorder<sup>1-21</sup>. NSSI is defined as a deliberate, albeit non-suicidal destruction of  
14 122 healthy body tissue, in which approximately 90% of BPD patients partake<sup>23</sup>. NSSI typically  
15 123 includes repeated behaviors, such as skin cutting, banging or hitting, burning, scratching and  
16 124 interfering with wound healing<sup>24</sup>. Further, emotion dysregulation is closely related to NSSI in  
17 125 persons with BPD. According to the experiential avoidance model, NSSI is applied to reduce or  
18 126 remove aversive emotional experiences and might be maintained by negative reinforcement<sup>25-27</sup>.

19  
20  
21  
22  
23  
24  
25  
26  
27 127 Empirical evidence suggests that NSSI is commonly performed as an emotion regulation strategy.  
28 128 Self-injurers use NSSI to reduce unpleasant feelings, overcome dissociation, for self-punishment or  
29 129 for the reduction of aversive inner tension<sup>28-29</sup>. Typically, NSSI is preceded by high arousal of  
30 130 negative emotions, NSSI behavior is then initiated to decrease these emotions<sup>29-30</sup>. For example, a  
31 131 decrease in negative affect and arousal was observed in self-injurers who were asked to visualize  
32 132 cutting or to engage in another painful behavior, whereas the performance of a non-NSSI-related  
33 133 task did not lead to a decrease<sup>29</sup>. In addition, seeing blood during NSSI seems to be an important  
34 134 aspect for many self-injurers. Glenn and Klonsky<sup>31</sup> investigated the role of seeing blood during NSSI  
35 135 in persons with a history of NSSI. Most participants (51.6%) reported that seeing blood during NSSI  
36 136 was important. Furthermore, participants reported that seeing blood fulfilled multiple functions,  
37 137 such as to relieve tension (84.8%), to calm down (72.7%), to feel real (51.5%), to show the realness  
38 138 of NSSI (42.4%), to help focus (33.3%) and to show that NSSI has been performed correctly/deep  
39 139 enough (15.2%). A pilot study by Naoum, et al.<sup>32</sup> compared 20 female BPD patients and 20 healthy  
40 140 controls (HC) to investigate the effect of seeing blood during NSSI following stress and pain  
41 141 induction. The BPD patients demonstrated a significantly stronger decrease in arousal compared to  
42 142 the HC group however, with no significant differences between blood and non-blood conditions. In  
43 143 addition, the urge for NSSI was associated with a significantly greater decrease in arousal in the  
44 144 blood condition in BPD patients. Yet, seeing blood did not result in greater relief of tension.

1  
2  
3 145 Despite the connection between emotion regulation deficits and NSSI in BPD, there are currently no  
4 146 studies utilizing stimuli depicting the varying stages of NSSI. Doing so would help investigate  
5 147 whether emotional reactions in BPD patients gradually depends on the stage of NSSI presented by  
6 148 the stimuli. Thus, a specified stimuli-database, validated in a BPD population for evoking emotional  
7 149 responses in BPD is lacking.

### 11 12 150 **This Study**

13 151 Although emotion dysregulation is recognized as a core symptom of BPD, current evidence is  
14 152 inconsistent and contradictory. This could be explained, at least partially, by the use of unsuitable  
15 153 and unspecific emotional stimuli that do not tap into BPD-relevant themes. However, to improve  
16 154 and extend research on emotion regulation in BPD, the availability of validated emotional stimuli,  
17 155 that reliably elicit emotional reactions specifically for BPD, is a necessary prerequisite.

18  
19  
20  
21  
22 156 This study aims to develop and validate an emotional picture set, EPSI (emotional picture set with  
23 157 scenes of self-injury), relevant for BPD. In a second step, emotional reactions will be assessed by  
24 158 means of a self-report measurement, as well as by a psychophysiological assessment of emotional  
25 159 reactions in participants with BPD who engage in NSSI, in a depressive control group and in a  
26 160 sample of matched healthy controls. Furthermore, participants are asked to indicate how strong the  
27 161 pictures relate to their person or biography. EPSI depicts objects frequently used for NSSI and  
28 162 shows the application of these objects at different stages of NSSI (objects only, pre-NSSI and during-  
29 163 NSSI). As NSSI can be associated with different emotional reactions depending on the stage of NSSI,  
30 164 differences in the emotional reactions are expected for participants with BPD and their respective  
31 165 NSSI stage. In the pre-NSSI stage (preparing for NSSI), negative affect, arousal and tension are  
32 166 expected to be strongest. As NSSI behavior begins, negative affect, arousal and tension might start to  
33 167 decrease. In the during-NSSI stage (successfully performed NSSI i.e. seeing blood), an even stronger  
34 168 decrease of emotions and a sense of relief and relaxation is expected. We predict that the control  
35 169 groups will show emotional reactions opposite that of BPD, that is, the control groups are expected  
36 170 to show low emotional responses when seeing pictures of NSSI objects and pictures of the pre-NSSI  
37 171 stage; they will show strong responses when watching pictures of the during-NSSI stage. Lastly, BPD  
38 172 participants are expected to report higher self-referencing in response to the pictures when  
39 173 compared to controls.

40  
41  
42 174 To investigate whether our database is BPD relevant, evaluations of the NSSI images will be  
43 175 compared with neutral images and with two separate control groups. In this way, the present study



1  
2  
3 176 will investigate to what extent EPSI can elicit an emotional response specifically for persons with  
4 177 BPD and if the emotional response differs with regard to the stage of NSSI.

## 7 178 **Objectives**

8  
9 179 The primary outcome variables include self-rated emotional reactions, as measured by the Self-  
10 180 Assessment-Manikin (SAM) <sup>33</sup>; psychophysiological parameters of emotional reactions will be  
11 181 assessed using heart rate variability (HRV), as an indicator of autonomic nervous system (ANS)  
12 182 activity. Finally, facial expressions will be analyzed and measured with the Noldus FaceReader  
13 183 software (Noldus Information Technology, [www.noldus.com](http://www.noldus.com)). As a secondary outcome variable,  
14 184 self-reference of EPSI will be measured on a 5-point Likert-scale, using the item 'How much do you  
15 185 see a relation to your own person/to your biography?' from 1 (not at all) to 5 (very much) <sup>18</sup>.

16  
17  
18  
19  
20  
21 186 Primary objectives:

- 22  
23 187 1. An NSSI image database will be created (EPSI) to develop a BPD-relevant stimulus set.  
24 188 2. A within-groups comparison of emotional reactions to EPSI and neutral stimuli will be  
25 189 conducted to validate EPSI. Moreover, the emotional reactions to EPSI will be compared  
26 190 amongst patients with BPD, depressed patients and healthy controls.

27  
28  
29  
30  
31 191 Secondary objectives:

- 32  
33 192 1. To assess how emotional reactions in participants with BPD, who engage in NSSI, gradually  
34 193 depend on seeing NSSI objects, pre-NSSI pictures and during NSSI pictures.  
35 194 2. To investigate if participants with BPD who engage in NSSI rate EPSI as more self-referential  
36 195 than matched healthy controls and depressive controls.  
37 196 3. To determine if self-referential measurement correlates positively with the actual emotional  
38 197 response.  
39 198 4. To assess if BPD symptomatology correlates positively with emotional responses.  
40 199 5. To investigate if self-rated emotional responses correlates with psychophysiological  
41 200 measurements of emotional responses within and between groups.

## 42 43 44 45 46 47 48 49 201 **Methods and analysis**

### 50 51 52 202 **Participants**

53  
54 203 In total, 90 participants (30 BPD patients, 30 depressed patients and 30 healthy control subjects)  
55 204 of 18-60 years of age will be recruited. To control for altered autonomic responses, all participants

1  
2  
3 205 must be free of severe and persistent neurological disorders (in particular, epilepsy, multiple  
4 206 sclerosis, stroke or neurodegenerative diseases). Participants are not allowed to be currently  
5 207 medicated with antihistamines, neuroleptic medication, tranquilizers or beta blockers. Further, the  
6 208 BPD patients must have a lifetime history of self-injury. Exclusion criteria for the BPD patients  
7 209 include psychotic disorders, current major depressive episode and acute suicidal crisis. Patients in  
8 210 the depressed control group need to have a current major depressive episode (depressive  
9 211 symptoms for at least 2 weeks). Depressive patients who also meet diagnostic criteria for a  
10 212 psychotic disorder will be excluded. The healthy control group must not exhibit a current  
11 213 psychiatric disorder or history of self-injury. Additional exclusion criteria for both control groups  
12 214 include attempted suicide or current suicidal ideation. Control groups will be matched to the BPD  
13 215 group on age and sex.

### 21 216 ***Patient and public involvement***

22 217 Patients were not involved in the development of the research question, outcome measures or study  
23 218 design.

### 24 219 **Diagnostic procedure**

25 220 Assessments of DSM-IV Personality Disorders (ADP-IV)<sup>34 35</sup> and the Borderline Symptom Checklist  
26 221 (BSL-23)<sup>36</sup> will be used to verify the diagnosis of BPD and to assess BPD symptoms. The structured  
27 222 clinical interview (SCID I,II) will be performed to assess psychiatric disorders<sup>37</sup>. Further, a  
28 223 demographic questionnaire, as well as the Edinburgh Handedness Inventory<sup>38</sup>, will be applied.

29 224 To record the history and methods of self-injury, the Inventory of Statements about Self-Injury  
30 225 (ISAS) and the Self-Harm Behavior Questionnaire (SHQ) will be applied<sup>39 40</sup>. Any outcome above  
31 226 zero (meaning that NSSI has been performed) on the ISAS or SHQ will be an exclusion criterion.  
32 227 General psychopathology will be recorded with the symptom checklist-90 (SCL-90)<sup>41</sup>. Depressive  
33 228 symptoms will be self-rated with the Beck Depression Inventory (BDI)<sup>42</sup>. Since the study will assess  
34 229 the emotional processing of images, the current mood and stress of the participants could have an  
35 230 influence. Therefore, they will be asked how emotionally strained and charged they are at the  
36 231 moment before and during testing, using a Likert-scale ranging from 0-10. A short break is planned  
37 232 in the middle of the experiment to check on the patients' psychological distress. Acute somatic and  
38 233 psychological dissociation will be assessed via the short version of the Dissociative State Scale (DSS)  
39 234<sup>43</sup>.

## 235 **Stimuli**

236 A professional photographer will photograph and process three NSSI related object and scene  
237 categories . These will include objects that are frequently used for NSSI by BPD patients (self-injury  
238 objects; SIO), scenic presentation of SIO use shortly before the injury (SIO<sub>bi</sub>) and scenic presentation  
239 during SIO use (SIO<sub>dur</sub>). SIOs will be selected based on use frequency, psychiatrists' expertise, and on  
240 the existing literature <sup>44-46</sup>. Actors will be instructed by experimenters to mimic SIO use; only their  
241 arms will be visible. Each image involving body-parts will be portrayed by a man and woman, to  
242 prevent gender-biased judgment (see Figure 1 for examples from EPSI for the three categories of  
243 objects and scenes).

## 244 **Experimental Design**

245 Participants will be asked to watch the images and to rate their current emotion on scales of  
246 arousal, dominance and valence, for which the Self-Assessment Manikin (SAM) will be used <sup>47</sup>. In  
247 addition, neutral objects will be displayed to provide control images (e.g., towels, books; see Figure  
248 2 for examples of neutral images), which will be taken from an existing and validated database <sup>48</sup>. A  
249 break will be included half way through the stimulus presentation, to assess participants' emotional  
250 status and to prevent dissociations <sup>49</sup>. Image presentation and SAM rating-screens will be  
251 pseudorandomized across all categories. Medical professionals will be monitoring the participants  
252 to prevent overstraining and to intervene if necessary. In total, 90 images will be shown (45 EPSI/  
253 45 neutral), each for 500 ms, followed by the SAM evaluation (see Figure 3 for the study design). At  
254 the end of the experiment, participants will perform a self-reference rating on all EPSI picture, using  
255 a 5-point scale with anchors: 1='Not at all related to me' and 5='Definitely related to me'. See table 1  
256 for study timeline flow.

257  
258 *-Please insert Figure 1-*

259  
260  
261 **Figure 1.** *Examples from EPSI for the three categories of objects and scenes for NSSI. From first in a row: objects that are frequently used for*  
262 *NSSI by BPD patients (self-injury objects; SIO), scenic presentation of usage shortly before the injury (SIO<sub>bi</sub>) and scenic presentation during*  
263 *the usage of SIO (SIO<sub>dur</sub>).*

264  
265 *-Please insert Figure 2-*

266 **Figure 2.** *Examples of neutral pictures from food-pics: an image database for experimental research on eating and appetite*

## 267 **Physiological Measurement**

### 268 **Autonomic nervous system**

269 Heart rate variability (HRV) is a valid and reliable indicator of autonomic nervous system (ANS)  
270 activity, and is a transdiagnostic marker of psychopathology<sup>50 51</sup>. Heart rate will be recorded  
271 continuously with an EC-12R PC-based resting ECG system (Labtech, Debrecen, Hungary). Three  
272 electrodes will be attached according to Einthoven's triangle and a ground at the right lower limb<sup>52</sup>.  
273 To derive HRV, a frequency domain analysis will be conducted by taking a Fourier transformed  
274 time-domain representation of the inter-beat-interval (IBI)<sup>53</sup>. Since we plan to record task-  
275 concurrent HR, the low (LF; 0.04-0.15 Hz) and high (HF; 0.15-0.4 Hz) frequency bands will be of  
276 particular interest,<sup>54</sup>. The HRV-data will be processed with the Kubios HRV software  
277 (www.kubios.com)<sup>55</sup>. A threshold-based artifact correction algorithm, as it is implemented in the  
278 Kubios software, will be performed. To separate ectopic and misplaced beats from the normal sinus  
279 rhythm, the automatic artifact correction algorithm will be used<sup>55</sup>. Further, heart rate reactivity will  
280 be calculated.

### 281 **Emotional face activation**

282 The universal emotions of happy, sad, angry, surprised, scared, disgusted, and neutral, as proposed  
283 by Ekman<sup>56</sup>, will be measured with Noldus FaceReader software (Noldus Information Technology,  
284 www.noldus.com). The program reliably detects facial expressions and was successfully applied in  
285 numerous studies<sup>57 58</sup>. Participants will be videotaped with a webcam throughout the session, using  
286 a frame-by-frame analysis during which 500+ key points of the participant's face will be localized  
287 and compared to a database of annotated images. The intensity of the universal emotions is then  
288 decoded on a scale from 0 to 1, where 0 indicates an absent emotion and 1 an intense emotional  
289 reaction. In addition to the universal emotions, the software also captures valence and arousal.  
290 Valence is calculated by subtracting the intensity of negative expressions (angry, scared and  
291 disgusted) from the intensity of 'happy' expressions. Arousal is calculated by subtracting the mean  
292 activation of specific facial muscle groups, occurring over the last 60 seconds, from current muscle  
293 activation. The mean of the five highest values then yields the value of arousal.

294 To prevent biased responses, each session will be calibrated with a neutral stimulus per participant.

295

1  
2  
3 296 -Please insert Figure3-  
4

5 297  
6

7 298  
8

9  
10 299 **Figure 3.** A) Study design. B) Experimental paradigm; NSSI=non-suicidal self-injury; SAM I/II/III=Self-Assessment Manikin  
11 (dominance, arousal and valence) presented pseudorandomized  
12

## 13 300 **Statistical analysis**

### 14 15 301 **Stimulus Validation**

16  
17  
18 302 Interrater reliability will be assessed with Krippendorff's alpha. The advantage of this method over  
19  
20 303 competing methods is that Krippendorff's alpha allows for more than two raters (unlike Cohen's  
21  
22 304 Kappa) and can handle missing data points (unlike Fleiss Kappa) <sup>59</sup>. The assumption of  
23  
24 305 Krippendorff's alpha is based on the observed disagreement corrected for disagreement by chance,  
25  
26 306 which is calculable within a range of -1 to 1, where 1 illustrates perfect agreement, 0 no agreement  
27  
28 307 beyond chance and negative values indicate inverse agreement <sup>59</sup> <sup>60</sup>. Bootstrapped confidence  
29  
30 308 intervals will be used since the distribution is not known, the derivation of the correct standard  
31  
32 309 error is not straightforward and the type 1 error level is acceptable <sup>59</sup> <sup>61</sup> <sup>62</sup>. Krippendorff's alpha will  
33  
34 310 be computed for each SAM-dimension, for each stimuli category.

### 35 36 311 **Behavioral Data**

37  
38 312 If the data show a normal distribution, a 2x3x4 between-subjects analysis of variance (ANOVA) will  
39  
40 313 be computed with the factors group, SAM-evaluation and stimulus category. Further, the  
41  
42 314 questionnaire scores will be correlated with the SAM-evaluations for each stimulus category. To  
43  
44 315 assess gender bias, a linear regression will be performed to rule out possible performance  
45  
46 316 differences.

### 47 317 48 318 **Physiological Data**

#### 49 319 **HRV**

50  
51  
52 320 Group-wise comparisons of HRV will be computed with a 2x2x4 ANOVA with the factors group,  
53  
54 321 frequencies and stimulus category.  
55

56 322  
57  
58  
59  
60

### 323 **Emotional Face Activation**

324 Facial expressions will be evaluated group-wise for each of the six universal emotions and stimulus  
 325 categories, which results in a 2x4x6 ANOVA under the assumption of normally distributed data.  
 326 Besides t-testing the group difference in valence and arousal, a correlation will be calculated with  
 327 the SAM dimensions of valence and arousal. This serves as a further measure of the reliability of the  
 328 participants' behavioral response with their physiological reaction to the stimuli.

### 329 **Sample size justification**

330 Based on calculations with G\*Power, a fixed effects ANOVA with 30 participants per group will yield  
 331 a large effect size (0.62) with a power of 0.66<sup>63</sup>. The size of the groups was derived from earlier  
 332 studies comparing the affective reaction of BPD patients with healthy controls while watching  
 333 images <sup>64</sup><sup>65</sup>.

334 **Table 1** Study timeline flow

| Months                            | 1 <sup>st</sup> year |   |   | 2 <sup>st</sup> year |    |    |    | 3 <sup>rd</sup> year |    |    |    |    |
|-----------------------------------|----------------------|---|---|----------------------|----|----|----|----------------------|----|----|----|----|
|                                   | 1                    | 4 | 7 | 10                   | 13 | 16 | 19 | 22                   | 25 | 28 | 31 | 34 |
| <b>Study preparation</b>          | X                    | X |   |                      |    |    |    |                      |    |    |    |    |
| <b>Recruitment</b>                | X                    | X | X |                      |    |    |    |                      |    |    |    |    |
| <b>Clinical conduct</b>           |                      |   | X |                      | X  | X  |    |                      |    |    |    |    |
| <b>Database clearing</b>          |                      |   |   |                      | X  | X  |    |                      |    |    |    |    |
| <b>Data analysis, publication</b> |                      |   |   |                      | X  | X  | X  | X                    | X  | X  | X  | X  |

### 336 **Ethics and dissemination**

337 The study will be conducted in accordance with the declaration of Helsinki in order to ensure the  
 338 well-being and rights of the participants. The project has received ethical approval by the local  
 339 medical ethics committee of the Carl-von-Ossietzky University of Oldenburg (registration: 2017-  
 340 044). Written informed consent will be obtained from all participants. Participants will be able to  
 341 withdraw from the study at any time without giving any reasons. Medical professionals will be  
 342 present at all times during the experiment. The study is registered at ClinicalTrials (URL), with the  
 343 trial registration number: NCT03149926. Results of the main trial and each of the secondary  
 344 endpoints will be submitted for publication in a peer-reviewed journal.

345 **Reference**

- 346 1. APA. Diagnostic and Statistical Manual of Mental Disorders, 5th edn.  
347 Washington DC: Amer Psychiatric Association 2013.
- 348 2. Lieb K, Zanarini MC, Schmahl C, et al. Borderline personality disorder.  
349 *Lancet (London, England)* 2004;364(9432):453-61. doi: 10.1016/s0140-  
350 6736(04)16770-6 [published Online First: 2004/08/04]
- 351 3. Linehan M. Cognitive-behavioral Treatment of Borderline Personality  
352 Disorder: Guilford Publications 1993.
- 353 4. Svaldi J, Dorn C, Matthies S, et al. Effects of suppression and acceptance of  
354 sadness on the urge for non-suicidal self-injury and self-punishment.  
355 *Psychiatry research* 2012;200(2-3):404-16. doi:  
356 10.1016/j.psychres.2012.06.030 [published Online First: 2012/07/24]
- 357 5. Eddie D, Bates ME, Vaschillo EG, et al. Rest, Reactivity, and Recovery: A  
358 Psychophysiological Assessment of Borderline Personality Disorder.  
359 *Front Psychiatry* 2018;9:505. doi: 10.3389/fpsy.2018.00505 [published  
360 Online First: 2018/11/06]
- 361 6. Baskin-Sommers AR, Hooley JM, Dahlgren MK, et al. Elevated Preattentive  
362 Affective Processing in Individuals with Borderline Personality Disorder:  
363 A Preliminary fMRI Study. *Front Psychol* 2015;6:1866. doi:  
364 10.3389/fpsyg.2015.01866 [published Online First: 2015/12/24]
- 365 7. Cullen KR, LaRiviere LL, Vizueta N, et al. Brain activation in response to  
366 overt and covert fear and happy faces in women with borderline  
367 personality disorder. *Brain imaging and behavior* 2016;10(2):319-31.  
368 doi: 10.1007/s11682-015-9406-4 [published Online First: 2015/05/27]
- 369 8. Hazlett EA, Zhang J, New AS, et al. Potentiated amygdala response to  
370 repeated emotional pictures in borderline personality disorder. *Biol*  
371 *Psychiatry* 2012;72(6):448-56. doi: 10.1016/j.biopsych.2012.03.027  
372 [published Online First: 2012/05/09]
- 373 9. Suvak MK, Sege CT, Sloan DM, et al. Emotional Processing in Borderline  
374 Personality Disorder. *Personality disorders* 2012;3(3):273-82. doi:  
375 10.1037/a0027331
- 376 10. Lobbetael J, Arntz A. Emotional hyperreactivity in response to childhood  
377 abuse by primary caregivers in patients with borderline personality  
378 disorder. *Journal of behavior therapy and experimental psychiatry*  
379 2015;48:125-32. doi: 10.1016/j.jbtep.2015.03.005 [published Online  
380 First: 2015/04/05]
- 381 11. Koenigsberg HW, Fan J, Ochsner KN, et al. Neural correlates of the use of  
382 psychological distancing to regulate responses to negative social cues: a  
383 study of patients with borderline personality disorder. *Biol Psychiatry*

- 1  
2  
3 384 2009;66(9):854-63. doi: 10.1016/j.biopsycho.2009.06.010 [published  
4 385 Online First: 2009/08/05]  
5  
6 386 12. Kraus A, Valerius G, Seifritz E, et al. Script-driven imagery of self-injurious  
7 387 behavior in patients with borderline personality disorder: a pilot fMRI  
8 388 study. *Acta Psychiatr Scand* 2010;121(1):41-51. doi: 10.1111/j.1600-  
9 389 0447.2009.01417.x  
10  
11 390 13. Sloan DM, Sege CT, McSweeney LB, et al. Development of a borderline  
12 391 personality disorder-relevant picture stimulus set. *Journal of personality*  
13 392 *disorders* 2010;24(5):664-75. doi: 10.1521/pedi.2010.24.5.664  
14 393 [published Online First: 2010/10/21]  
15  
16 394 14. van Zutphen L, Siep N, Jacob GA, et al. Emotional sensitivity, emotion  
17 395 regulation and impulsivity in borderline personality disorder: a critical  
18 396 review of fMRI studies. *Neuroscience and biobehavioral reviews*  
19 397 2015;51:64-76. doi: 10.1016/j.neubiorev.2015.01.001 [published Online  
20 398 First: 2015/01/24]  
21  
22 399 15. Feliu-Soler A, Pascual JC, Soler J, et al. Emotional responses to a negative  
23 400 emotion induction procedure in Borderline Personality Disorder.  
24 401 *International Journal of Clinical and Health Psychology* 2013;13(1):9-17.  
25 402 doi: [https://doi.org/10.1016/S1697-2600\(13\)70002-4](https://doi.org/10.1016/S1697-2600(13)70002-4)  
26  
27 403 16. Kuo JR, Linehan MM. Disentangling emotion processes in borderline  
28 404 personality disorder: physiological and self-reported assessment of  
29 405 biological vulnerability, baseline intensity, and reactivity to emotionally  
30 406 evocative stimuli. *Journal of abnormal psychology* 2009;118(3):531-44.  
31 407 doi: 10.1037/a0016392 [published Online First: 2009/08/19]  
32  
33 408 17. Eddie D, Bates ME. Toward validation of a borderline personality disorder-  
34 409 relevant picture set. *Personal Disord* 2017;8(3):255-60. doi:  
35 410 10.1037/per0000173 [published Online First: 2016/04/06]  
36  
37 411 18. Sauer C, Arens EA, Stopsack M, et al. Emotional hyper-reactivity in  
38 412 borderline personality disorder is related to trauma and interpersonal  
39 413 themes. *Psychiatry research* 2014;220(1-2):468-76. doi:  
40 414 10.1016/j.psychres.2014.06.041 [published Online First: 2014/07/30]  
41  
42 415 19. Kučera D, Haviger J. Using Mood Induction Procedures in Psychological  
43 416 Research. *Procedia - Social and Behavioral Sciences* 2012;69(Supplement  
44 417 C):31-40. doi: <https://doi.org/10.1016/j.sbspro.2012.11.380>  
45  
46 418 20. Philippot P, Schaefer A, Herbette G. Consequences of specific processing of  
47 419 emotional information: Impact of general versus specific  
48 420 autobiographical memory priming on emotion elicitation. *Emotion*  
49 421 *(Washington, DC)* 2003;3(3):270-83. doi: 10.1037/1528-3542.3.3.270  
50 422 [published Online First: 2003/09/23]  
51  
52  
53  
54  
55  
56  
57  
58  
59



- 1  
2  
3 423 21. Zetterqvist M. The DSM-5 diagnosis of nonsuicidal self-injury disorder: a  
4 424 review of the empirical literature. *Child and adolescent psychiatry and*  
5 425 *mental health* 2015;9:31. doi: 10.1186/s13034-015-0062-7 [published  
6 426 Online First: 2015/09/30]  
7  
8 427 22. Association AP. Diagnostic and Statistical Manual of Mental Disorders:  
9 428 Dsm-5: Amer Psychiatric Pub Incorporated 2013.  
10  
11 429 23. Zanarini MC, Frankenburg FR, Reich DB, et al. The 10-year course of  
12 430 physically self-destructive acts reported by borderline patients and axis  
13 431 II comparison subjects. *Acta psychiatrica Scandinavica* 2008;117(3):177-  
14 432 84. doi: 10.1111/j.1600-0447.2008.01155.x [published Online First:  
15 433 2008/02/05]  
16  
17 434 24. Favazza AR. The coming of age of self-mutilation. *J Nerv Ment Dis*  
18 435 1998;186(5):259-68. [published Online First: 1998/06/05]  
19  
20 436 25. Reitz S, Kluetsch R, Niedtfeld I, et al. Incision and stress regulation in  
21 437 borderline personality disorder: neurobiological mechanisms of self-  
22 438 injurious behaviour. *The British journal of psychiatry : the journal of*  
23 439 *mental science* 2015;207(2):165-72. doi: 10.1192/bjp.bp.114.153379  
24 440 [published Online First: 2015/04/25]  
25  
26 441 26. Chapman AL, Gratz KL, Brown MZ. Solving the puzzle of deliberate self-  
27 442 harm: the experiential avoidance model. *Behaviour research and therapy*  
28 443 2006;44(3):371-94. doi: 10.1016/j.brat.2005.03.005 [published Online  
29 444 First: 2006/02/01]  
30  
31 445 27. Nock MK, Prinstein MJ. A functional approach to the assessment of self-  
32 446 mutilative behavior. *Journal of consulting and clinical psychology*  
33 447 2004;72(5):885-90. doi: 10.1037/0022-006x.72.5.885 [published Online  
34 448 First: 2004/10/16]  
35  
36 449 28. Andover MS, Morris BW. Expanding and clarifying the role of emotion  
37 450 regulation in nonsuicidal self-injury. *Canadian journal of psychiatry*  
38 451 *Revue canadienne de psychiatrie* 2014;59(11):569-75. doi:  
39 452 10.1177/070674371405901102 [published Online First: 2015/01/08]  
40 453  
41 454 29. Klonsky ED. The functions of deliberate self-injury: a review of the  
42 455 evidence. *Clinical psychology review* 2007;27(2):226-39. doi:  
43 456 10.1016/j.cpr.2006.08.002 [published Online First: 2006/10/04]  
44 457  
45 458 30. Victor SE, Klonsky ED. Daily emotion in non-suicidal self-injury. *J Clin*  
46 459 *Psychol* 2014;70(4):364-75. doi: 10.1002/jclp.22037 [published Online  
47 460 First: 2013/09/05]  
48 461  
49 462 31. Glenn CR, Klonsky ED. The role of seeing blood in non-suicidal self-injury. *J*  
50 463 *Clin Psychol* 2010;66(4):466-73. doi: 10.1002/jclp.20661 [published  
51 464 Online First: 2010/02/09]  
52  
53  
54  
55  
56  
57  
58  
59  
60

- 1  
2  
3 462 32. Naoum J, Reitz S, Krause-Utz A, et al. The role of seeing blood in non-  
4 463 suicidal self-injury in female patients with borderline personality  
5 464 disorder. *Psychiatry research* 2016;246:676-82. doi:  
6 465 10.1016/j.psychres.2016.10.066 [published Online First: 2016/11/11]  
7 466  
8 467 33. Bradley MM, Lang PJ. Measuring emotion: the Self-Assessment Manikin and  
9 468 the Semantic Differential. *Journal of behavior therapy and experimental*  
10 469 *psychiatry* 1994;25(1):49-59. [published Online First: 1994/03/01]  
11 470  
12 471 34. Schotte C, De Doncker D. ADP-IV Questionnaire. *University Hospital*  
13 472 *Antwerp, Antwerp* 1994  
14 473  
15 474 35. Doering S, Renn D, Höfer S, et al. Validierung der deutschen Version des  
16 475 Fragebogens zur Erfassung von DSM-IV Persönlichkeitsstörungen (ADP-  
17 476 IV). *Zeitschrift für Psychosomatische Medizin und Psychotherapie*  
18 477 2007;53(2):111-28.  
19 478  
20 479 36. Wolf M, Limberger M, Kleindienst N, et al. Kurzversion der Borderline-  
21 480 Symptom-Liste (BSL-23): Entwicklung und Überprüfung der  
22 481 psychometrischen Eigenschaften. *Psychiatrie, Psychosomatik und*  
23 482 *Medizinische Psychologie. Psychother Psychosom Med Psychol*  
24 483 2009;59:321-24.  
25 484  
26 485 37. Wittchen H-U, Wunderlich U, Gruschwitz S, et al. SKID I. Strukturiertes  
27 486 Klinisches Interview für DSM-IV. Achse I: Psychische Störungen.  
28 487 Interviewheft und Beurteilungsheft. Eine deutschsprachige, erweiterte  
29 488 Bearb. d. amerikanischen Originalversion des SKID I. 1997  
30 489  
31 490 38. Oldfield RC. The assessment and analysis of handedness: the Edinburgh  
32 491 inventory. *Neuropsychologia* 1971;9(1):97-113.  
33 492  
34 493 39. Klonsky ED, Glenn CR. Assessing the functions of non-suicidal self-injury:  
35 494 Psychometric properties of the Inventory of Statements About Self-  
36 495 injury (ISAS). *Journal of Psychopathology and Behavioral Assessment*  
37 496 2009;31(3):215-19.  
38 497  
39 498 40. Gutierrez PM, Osman A, Barrios FX, et al. Development and initial  
40 499 validation of the Self-Harm Behavior Questionnaire. *Journal of*  
41 500 *Personality Assessment* 2001;77(3):475-90.  
42  
43 493 41. Franke GH. Symptom-Checkliste von Derogatis (SCL-90-R): Beltz Test  
44 494 2002.  
45 495  
46 496 42. Beck AT, Steer RA, Brown GK. BDI-II, Beck Depression Inventory: Manual:  
47 497 Psychological Corporation 1996.  
48 498  
49 499 43. Stiglmayr CE, Braakmann D, Haaf B, et al. Entwicklung und  
50 500 psychometrische Charakteristika der Dissoziations-Spannungs-Skala  
51 akut (DSS-akut). *PPmP-Psychotherapie· Psychosomatik· Medizinische*  
52 *Psychologie* 2003;53(07):287-94.  
53  
54  
55  
56  
57  
58  
59  
60

- 1  
2  
3 501 44. Svaldi J, Dorn C, Matthies S, et al. Effects of suppression and acceptance of  
4 502 sadness on the urge for non-suicidal self-injury and self-punishment.  
5 503 *Psychiatry research* 2012;200(2):404-16.  
6  
7 504 45. Brown R, Fischer T, Goldwisch A, et al. # cutting: Non-suicidal self-injury  
8 (NSSI) on Instagram. *Psychological medicine* 2018;48(2):337-46.  
9 505  
10 506 46. Klonsky ED. The functions of deliberate self-injury: A review of the  
11 507 evidence. *Clinical psychology review* 2007;27(2):226-39.  
12  
13 508 47. Bradley MM, Lang PJ. Measuring emotion: the self-assessment manikin and  
14 509 the semantic differential. *Journal of behavior therapy and experimental*  
15 510 *psychiatry* 1994;25(1):49-59.  
16  
17 511 48. Blechert J, Meule A, Busch NA, et al. Food-pics: an image database for  
18 512 experimental research on eating and appetite. *Front Psychol* 2014;5:617.  
19 513 doi: 10.3389/fpsyg.2014.00617  
20  
21 514 49. Jaeger S, Steinert T, Uhlmann C, et al. Dissociation in patients with  
22 515 borderline personality disorder in acute inpatient care—A latent profile  
23 516 analysis. *Comprehensive Psychiatry* 2017;78:67-75.  
24  
25 517 50. Koenig J, Rinnewitz L, Parzer P, et al. Resting cardiac function in adolescent  
26 518 non-suicidal self-injury: the impact of borderline personality disorder  
27 519 symptoms and psychosocial functioning. *Psychiatry research*  
28 520 2017;248:117-20.  
29  
30 521 51. Wilson ST, Chesin M, Fertuck E, et al. Heart rate variability and suicidal  
31 522 behavior. *Psychiatry research* 2016;240:241-47.  
32  
33 523 52. Einthoven W, Fahr G, De Waart A. Über die Richtung und die manifeste  
34 524 Grösse der Potentialschwankungen im menschlichen Herzen und über  
35 525 den Einfluss der Herzlage auf die Form des Elektrokardiogramms.  
36 526 *Pflügers Archiv European Journal of Physiology* 1913;150(6):275-315.  
37  
38 527 53. Allen JJ, Chambers AS, Towers DN. The many metrics of cardiac  
39 528 chronotropy: A pragmatic primer and a brief comparison of metrics.  
40 529 *Biological psychology* 2007;74(2):243-62.  
41  
42 530 54. Thayer JF, Hansen AL, Johnsen BH. The non-invasive assessment of  
43 531 autonomic influences on the heart using impedance cardiography and  
44 532 heart rate variability. *Handbook of behavioral medicine*: Springer  
45 533 2010:723-40.  
46  
47 534 55. Tarvainen MP, Niskanen J-P, Lipponen JA, et al. Kubios HRV—heart rate  
48 535 variability analysis software. *Computer methods and programs in*  
49 536 *biomedicine* 2014;113(1):210-20.  
50  
51 537 56. Ekman P, Keltner D. Universal facial expressions of emotion. *California*  
52 538 *mental health research digest* 1970;8(4):151-58.  
53  
54  
55  
56  
57  
58  
59  
60

- 1  
2  
3 539 57. Boerner KE, Chambers CT, McGrath PJ, et al. The Effect of Parental  
4 540 Modeling on Child Pain Responses: The Role of Parent and Child Sex. *The*  
5 541 *Journal of Pain* 2017;18(6):702-15.  
6 542 58. Dalton PS, Jimenez VH, Noussair CN. Exposure to poverty and  
7 543 productivity. *PloS one* 2017;12(1):e0170231.  
8 544 59. Zapf A, Castell S, Morawietz L, et al. Measuring inter-rater reliability for  
9 545 nominal data—which coefficients and confidence intervals are  
10 546 appropriate? *BMC medical research methodology* 2016;16(1):93.  
11 547 60. Krippendorff K. Estimating the reliability, systematic error and random  
12 548 error of interval data. *Educational and Psychological Measurement*  
13 549 1970;30(1):61-70.  
14 550 61. Vanbelle S, Albert A. A bootstrap method for comparing correlated kappa  
15 551 coefficients. *Journal of Statistical Computation and Simulation*  
16 552 2008;78(11):1009-15.  
17 553 62. McKenzie DP, Mackinnon AJ, Péladeau N, et al. Comparing correlated  
18 554 kappas by resampling: Is one level of agreement significantly different  
19 555 from another? *Journal of psychiatric research* 1996;30(6):483-92.  
20 556 63. Faul F, Erdfelder E, Lang A-G, et al. G\* Power 3: A flexible statistical power  
21 557 analysis program for the social, behavioral, and biomedical sciences.  
22 558 *Behavior research methods* 2007;39(2):175-91.  
23 559 64. Sauer C, Arens EA, Stopsack M, et al. Emotional hyper-reactivity in  
24 560 borderline personality disorder is related to trauma and interpersonal  
25 561 themes. *Psychiatry research* 2014;220(1):468-76.  
26 562 65. Eddie D, Bates ME. Toward validation of a borderline personality disorder-  
27 563 relevant picture set. *Personality Disorders: Theory, Research, and*  
28 564 *Treatment* 2017;8(3):255.  
29  
30  
31  
32  
33  
34  
35  
36  
37  
38  
39  
40  
41  
42 566  
43  
44  
45  
46  
47  
48  
49  
50  
51  
52  
53  
54  
55  
56  
57  
58  
59  
60

1  
2  
3 567 **Authors' contributions**  
4

5 568 KB, MS: study design, literature search, figures, writing  
6

7 569 PS: study design, literature search, writing, supervision  
8  
9

10 570 CS: study design, supervision  
11

12 571 AP: study design, literature search, writing, supervision  
13  
14  
15

16 572 **Funding statement**  
17

18 573 This research received no specific grant from any funding agency in the public, commercial or not-  
19 for-profit sectors.  
20 574  
21  
22

23 575 **Competing interests statement**  
24

25 576 KB, MS, PS, CS declare that the research was conducted in the absence of any commercial or  
26 financial relationships that could be construed as a potential conflict of interest.  
27 577  
28

29 578 AP declares that she served on advisory boards, gave lectures, performed phase 3 studies, or  
30 received travel grants within the last 3 years from Eli Lilly and Co, Lundbeck, MEDICE Arzneimittel,  
31 Pütter GmbH and Co KG, Novartis, Servier and Shire; and has authored books and articles on ADHD  
32 published by Elsevier, Hogrefe, Schattauer, Kohlhammer, Karger and Springer.  
33 580  
34 581  
35  
36

37 582  
38

39 583  
40  
41  
42  
43  
44  
45  
46  
47  
48  
49  
50  
51  
52  
53  
54  
55  
56  
57  
58  
59  
60

1  
2  
3  
4  
5  
6  
7  
8  
9  
10  
11  
12  
13  
14  
15  
16  
17  
18  
19  
20  
21  
22  
23  
24  
25  
26  
27  
28  
29  
30  
31  
32  
33  
34  
35  
36  
37  
38  
39  
40  
41  
42  
43  
44  
45  
46  
47  
48  
49  
50  
51  
52  
53  
54  
55  
56  
57  
58  
59  
60

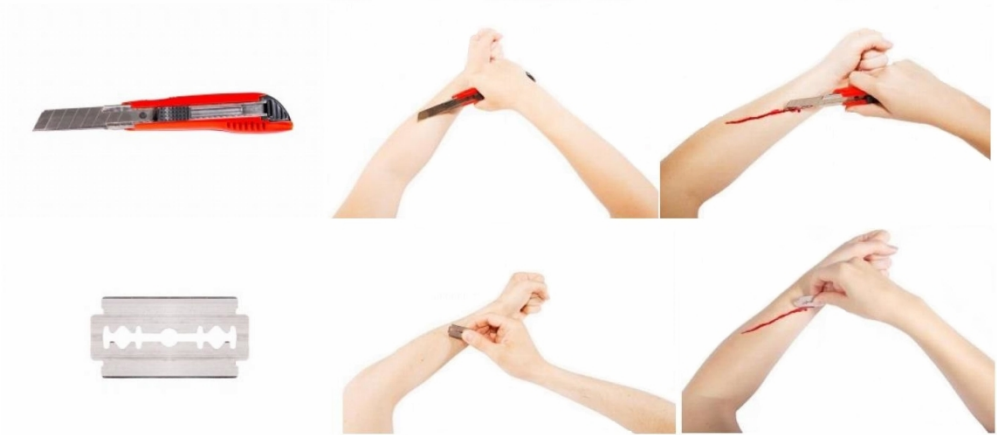

Figure 1. Examples from EPSI for the three categories of objects and scenes for NSSI. From first in a row: objects that are frequently used for NSSI by BPD patients (self-injury objects; SIO), scenic presentation of usage shortly before the injury (SIObi), and scenic presentation during the usage of SIO (SIOdur).

312x154mm (300 x 300 DPI)

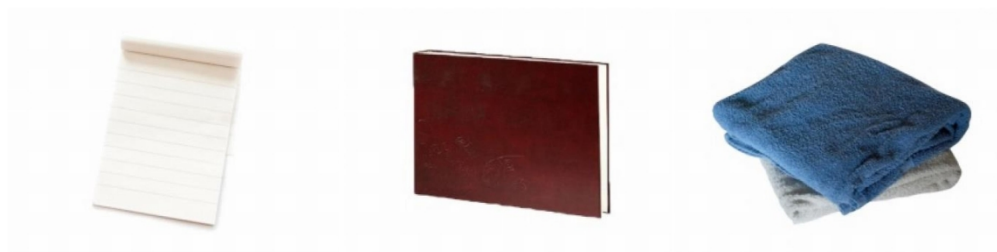

Figure 2. Examples of neutral pictures from food-pics: an image database for experimental research on eating and appetite

311x93mm (300 x 300 DPI)

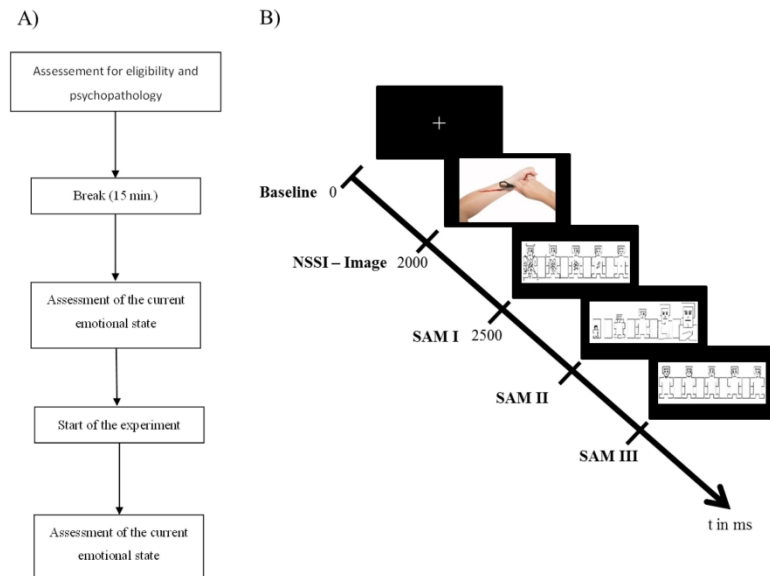

Figure 3. A) Study design. B) Experimental paradigm; NSSI=non-suicidal self-injury; SAM I/II/III=Self-Assessment Manikin (Dominance, Arousal, and Valence) presented pseudorandomized

311x196mm (300 x 300 DPI)
